# Supplementary material
Source: PubMed Central journal article supplement (PMC6737241)
Supplement: mBio.01668-19-sf001.pdf [file mBio.01668-19-sf001.pdf]

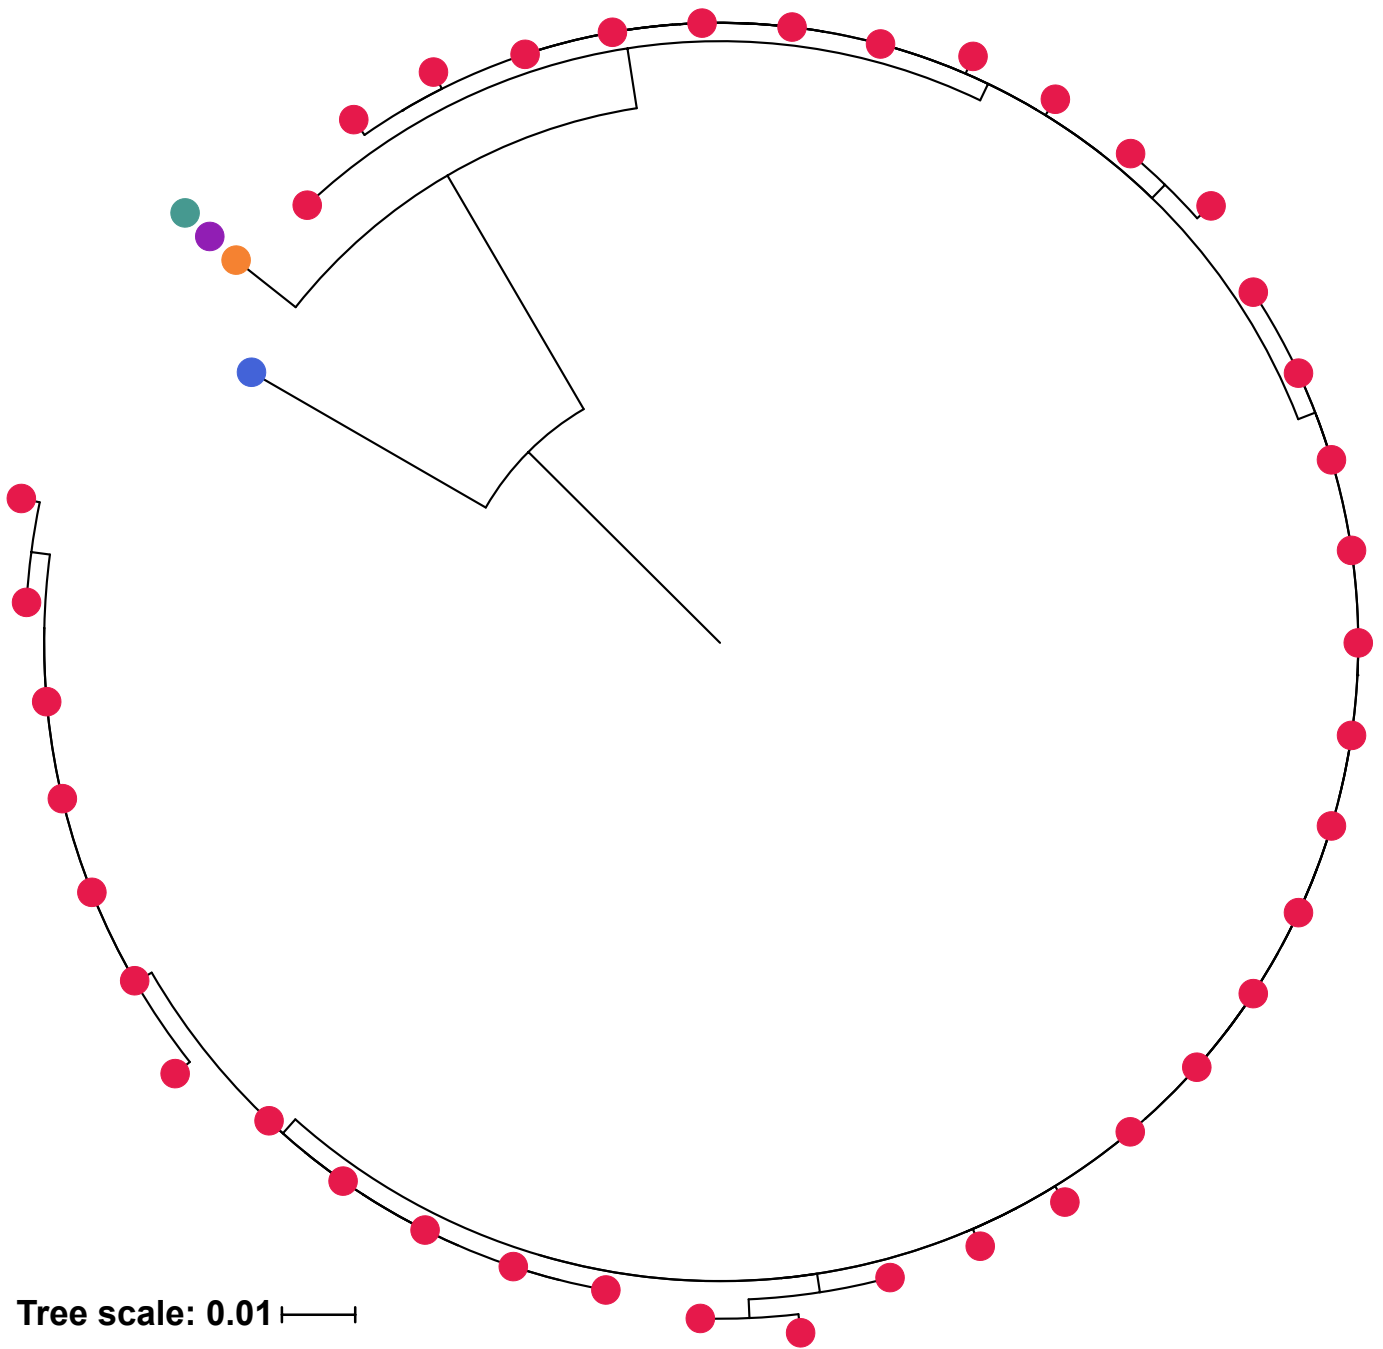

| AniA                                                                                  |                                |
|---------------------------------------------------------------------------------------|--------------------------------|
|  | <i>N.meningitidis</i> NZ98/254 |
|  | <i>N.meningitidis</i> H44/76   |
|  | <i>N.meningitidis</i> MC58     |
|  | <i>N.meningitidis</i> CU385/83 |
|  | <i>N.gonorrhoeae</i>           |

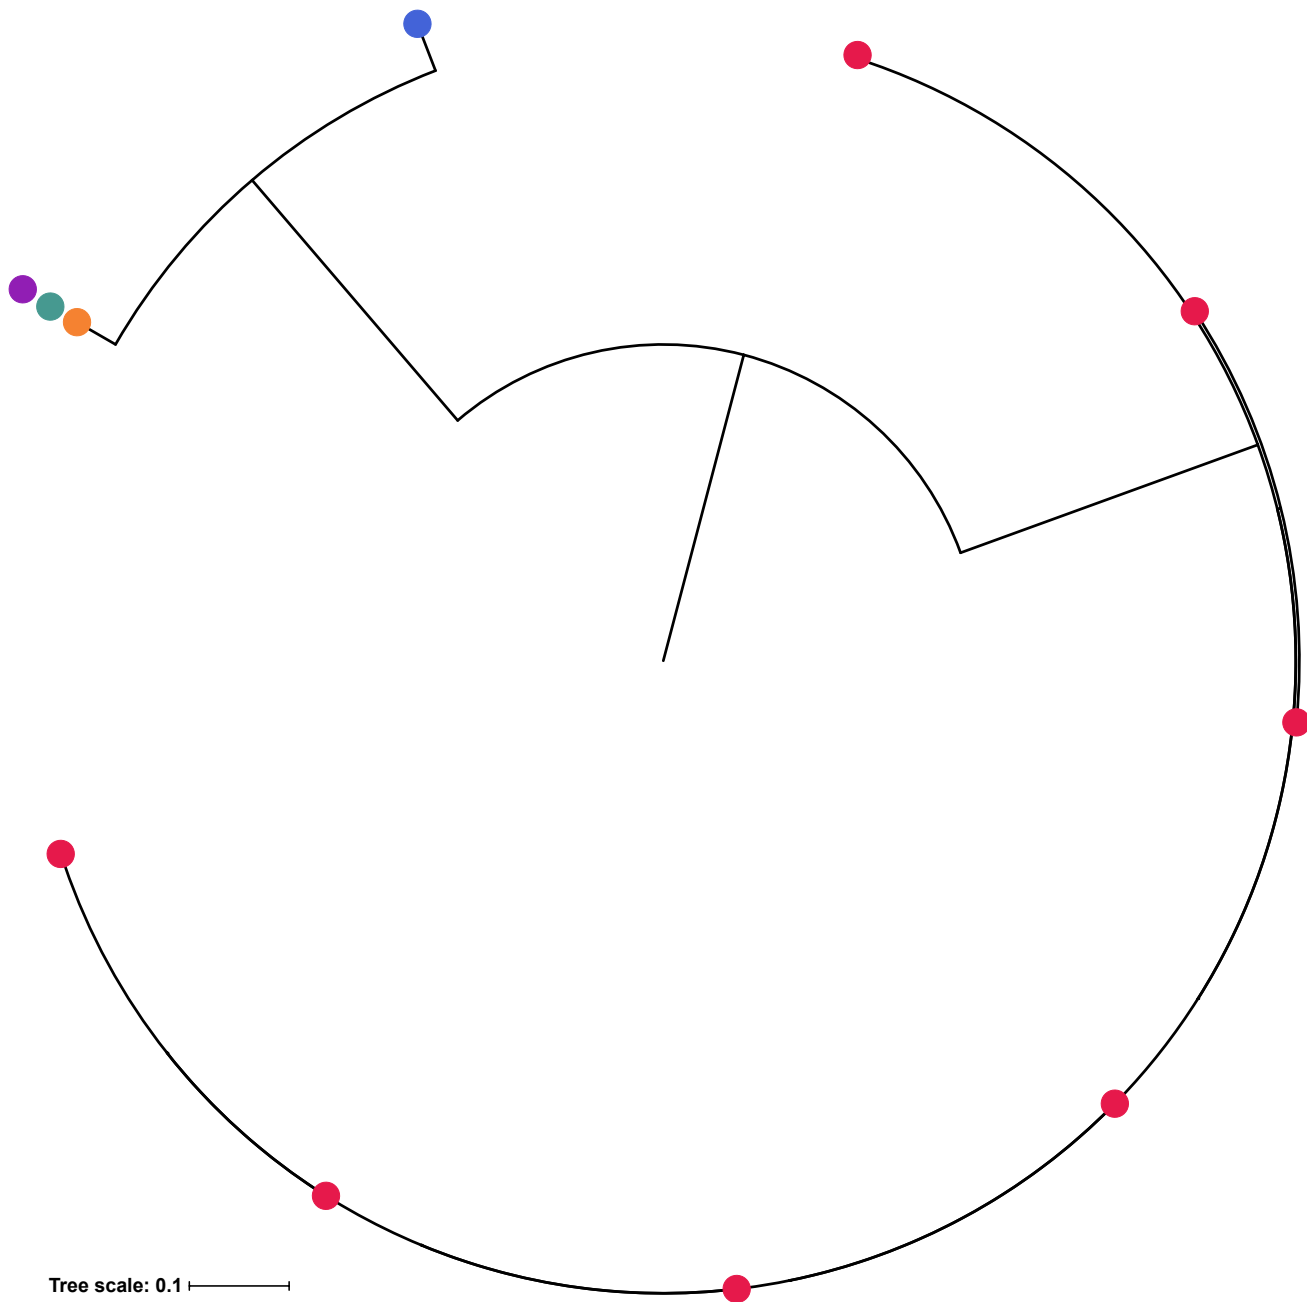

Tree scale: 0.1

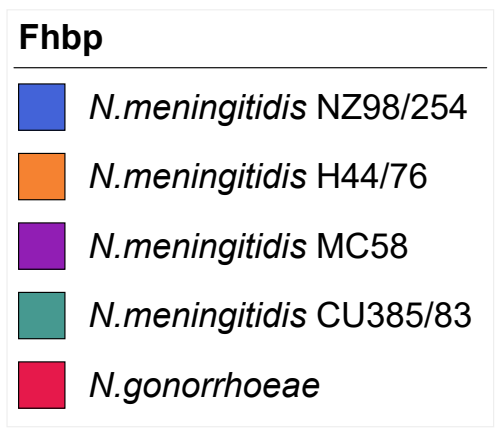

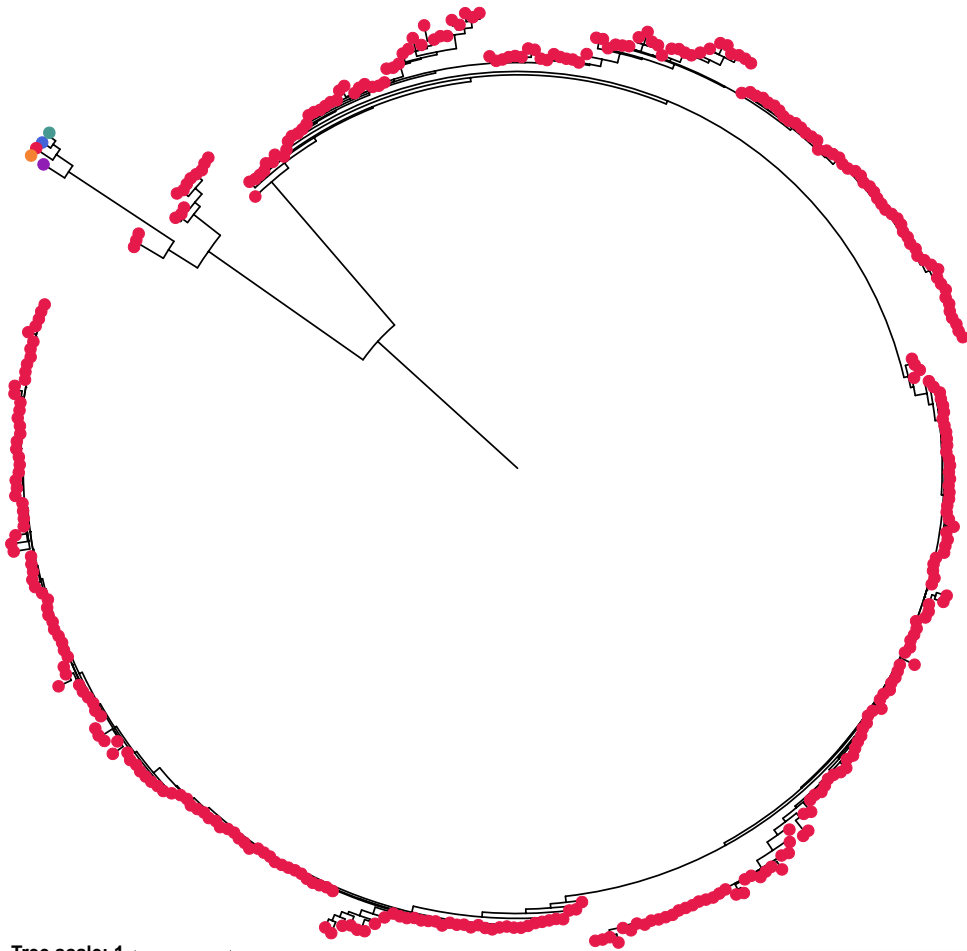

Tree scale: 1

### PorB

-  *N.meningitidis* NZ98/254
-  *N.meningitidis* H44/76
-  *N.meningitidis* MC58
-  *N.meningitidis* CU385/83
-  *N.gonorrhoeae*

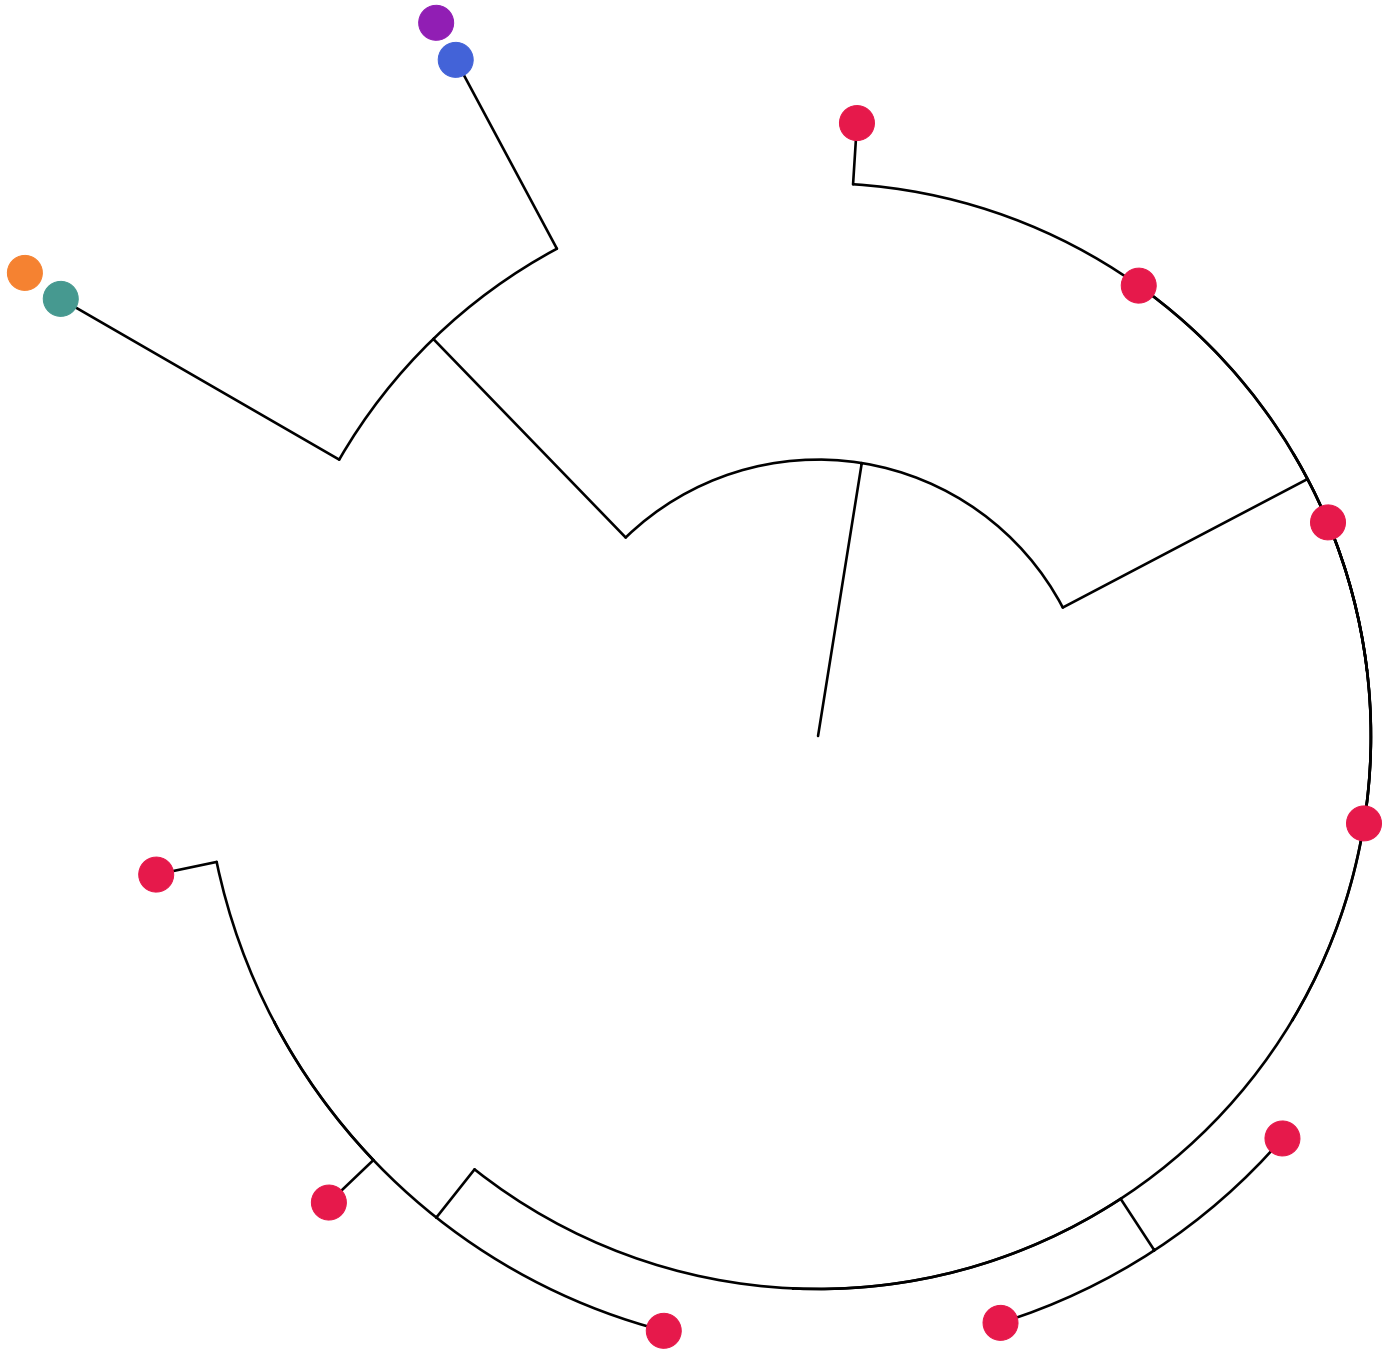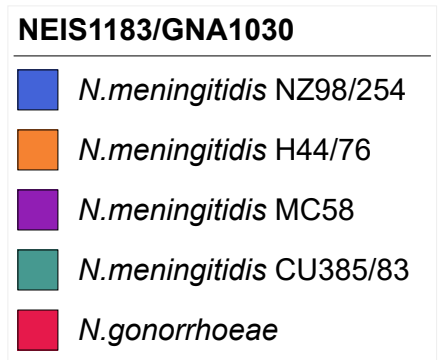

Tree scale: 0.01 

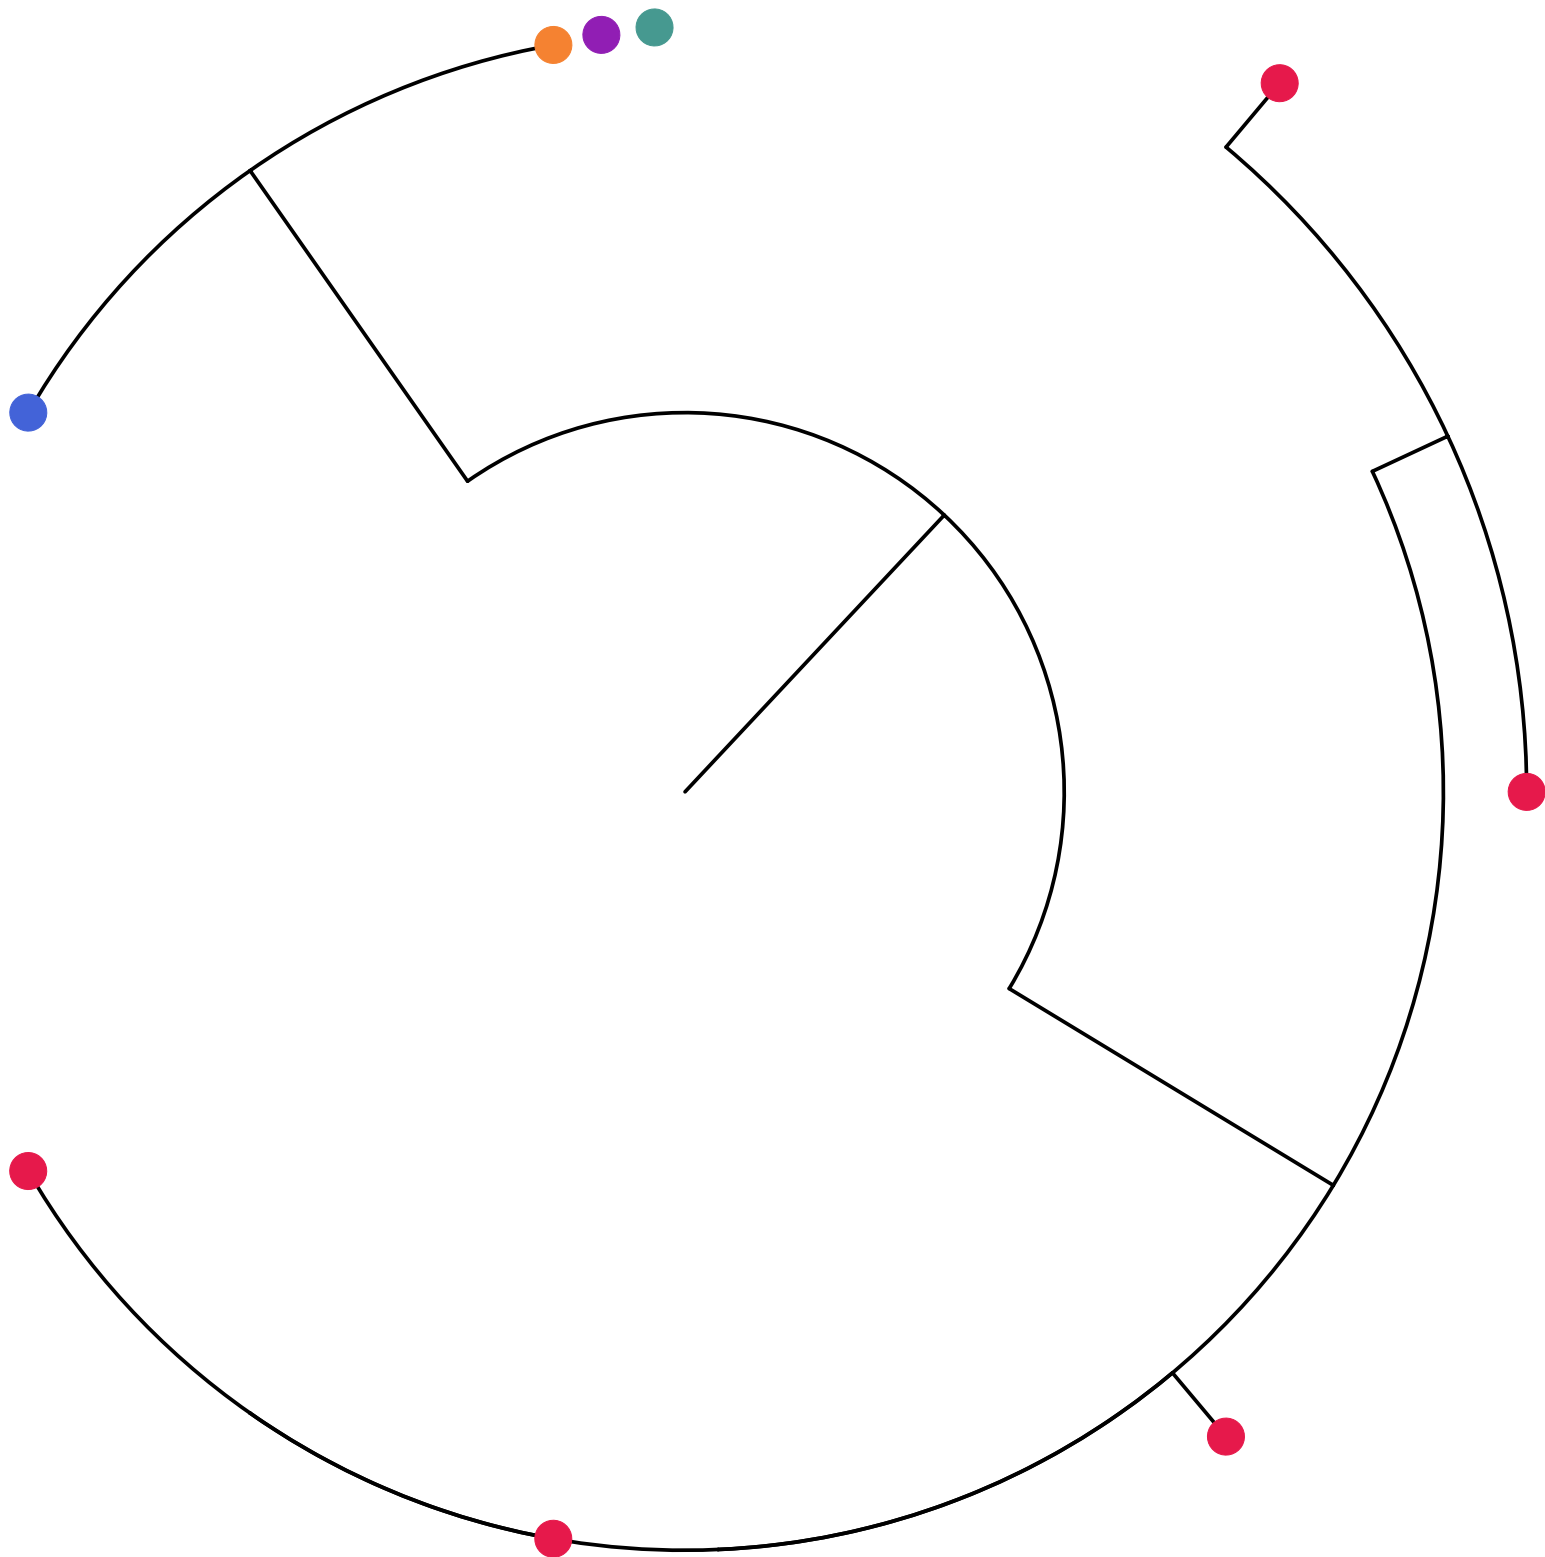

Tree scale: 0.01

**NEIS2071/GNA2091**

-  *N. meningitidis* NZ98/254
-  *N. meningitidis* H44/76
-  *N. meningitidis* MC58
-  *N. meningitidis* CU385/83
-  *N. gonorrhoeae*

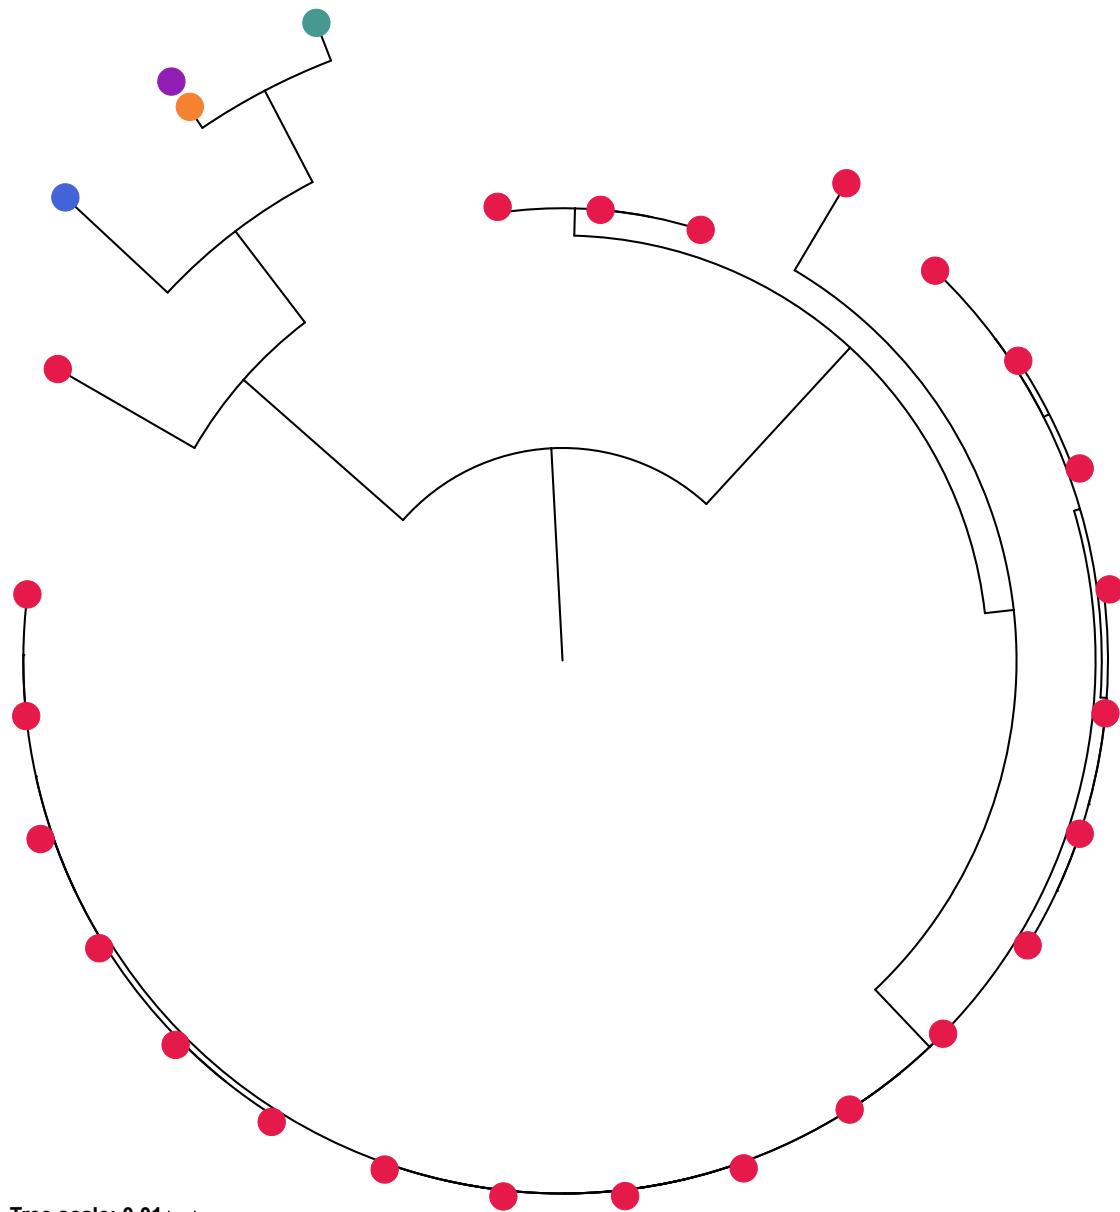

Tree scale: 0.01

### NhbA

-  *N.meningitidis* NZ98/254
-  *N.meningitidis* H44/76
-  *N.meningitidis* MC58
-  *N.meningitidis* CU385/83
-  *N.gonorrhoeae*

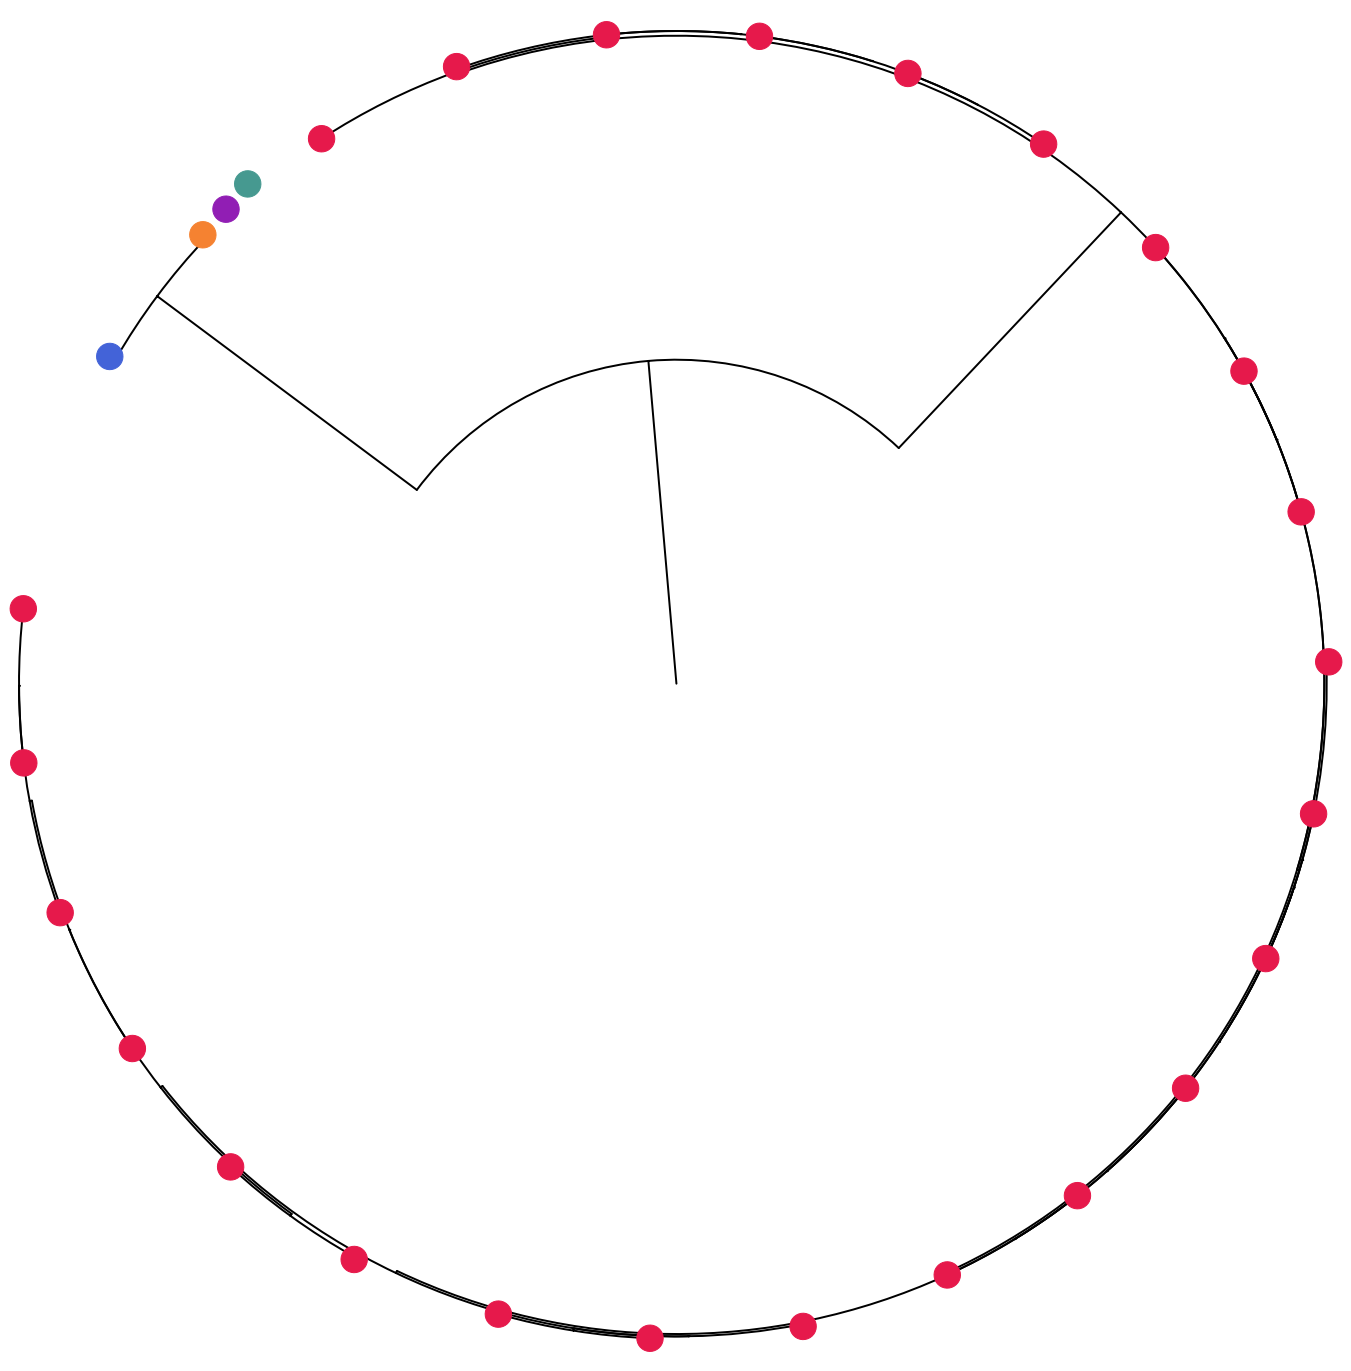

Tree scale: 0.1

**OpcA**

|                                                                                       |                                |
|---------------------------------------------------------------------------------------|--------------------------------|
|  | <i>N.meningitidis</i> NZ98/254 |
|  | <i>N.meningitidis</i> H44/76   |
|  | <i>N.meningitidis</i> MC58     |
|  | <i>N.meningitidis</i> CU385/83 |
|  | <i>N.gonorrhoeae</i>           |
