# Supplementary material
Source: PubMed Central journal article supplement (PMC6737241)
Supplement: mBio.01668-19-st001.pdf [file mBio.01668-19-st001.pdf]

**Common genes found in 4 NmB and 970 Ng strains**

| <b>Gene</b> | <b>NEIS #</b> |
|-------------|---------------|
| abcZ        | NEIS1015      |
| aceF        | NEIS1279      |
| acnA        | NEIS1729      |
| acnB        | NEIS1492      |
| adk         | NEIS0767      |
| aldA        | NEIS1942      |
| amiC        | NEIS1694      |
| ampD        | NEIS0617      |
| ampG        | NEIS1808      |
| aniA        | NEIS1549      |
| anmK        | NEIS1788      |
| apaH        | NEIS0610      |
| ape1        | NEIS1205      |
| argH        | NEIS0580      |
| aroE        | NEIS1810      |
| arsR        | NEIS1769      |
| asnC        | NEIS1566      |
| aspA        | NEIS1185      |
| bioF        | NEIS1676      |
| ccoN        | NEIS1645      |
| ccoO        | NEIS1643      |
| clpS        | NEIS0775      |
| cmk         | NEIS1237      |
| cybB        | NEIS2066      |
| cysU        | NEIS0822      |
| dadA        | NEIS0166      |
| dnaN        | NEIS0321      |
| dnaQ        | NEIS1443      |
| dsbA1       | NEIS0273      |
| dsbA3       | NEIS1760      |
| eno         | NEIS1220      |
| ermB        | NEIS0366      |
| etfB        | NEIS2133      |
| farA        | NEIS1853      |
| farB        | NEIS1852      |
| fba         | NEIS0350      |
| fetB2       | NEIS0340      |
| fHbp        | NEIS0349      |
| fis         | NEIS1353      |
| folB        | NEIS1027      |
| fumA        | NEIS1534      |
| fumC        | NEIS1396      |
| fur         | NEIS0197      |
| galE        | NEIS0048      |

|       |          |
|-------|----------|
| galU  | NEIS0581 |
| gapA  | NEIS0199 |
| gatC  | NEIS1290 |
| gcp   | NEIS0419 |
| gdh   | NEIS1331 |
| glmU  | NEIS0015 |
| gloA  | NEIS1830 |
| gltA  | NEIS0930 |
| gmhA  | NEIS2070 |
| gmhB  | NEIS2014 |
| gntP  | NEIS2006 |
| gpm   | NEIS1524 |
| gyrA  | NEIS1320 |
| gyrB  | NEIS0204 |
| hemk  | NEIS2046 |
| hfq   | NEIS0702 |
| hisE  | NEIS0546 |
| hldA  | NEIS0769 |
| hldC  | NEIS2055 |
| hldD  | NEIS0773 |
| hmbR  | hmbR     |
| hscA  | NEIS1070 |
| hscB  | NEIS1319 |
| icd   | NEIS0897 |
| infA  | NEIS0153 |
| infC  | NEIS0673 |
| kdsA  | NEIS1218 |
| kdsB  | NEIS0624 |
| kdsC  | NEIS1815 |
| kdtA  | NEIS2152 |
| kpsF  | NEIS1816 |
| lgtF  | NEIS1618 |
| lot   | NEIS0291 |
| lpd   | NEIS1280 |
| lpdA2 | NEIS0924 |
| lpt3  | NEIS1986 |
| lptA  | NEIS1553 |
| lpxA  | NEIS0168 |
| lpxC  | NEIS0001 |
| lpxD  | NEIS0171 |
| lpxH  | NEIS0483 |
| lpxK  | NEIS0621 |
| lpxL  | NEIS1351 |
| lpxL2 | NEIS0421 |
| lspA  | NEIS0384 |
| lst   | NEIS0899 |
| macA  | NEIS0488 |

|          |          |
|----------|----------|
| macB     | NEIS0489 |
| maeA     | NEIS0620 |
| mafB1    | NEIS0586 |
| minD     | NEIS0161 |
| msbA     | NEIS0304 |
| mtgA     | NEIS1811 |
| mtrC     | NEIS1634 |
| mtrD     | NEIS1633 |
| mtrE     | NEIS1632 |
| mtrR     | NEIS1635 |
| mutY     | NEIS1336 |
| nagZ     | NEIS0469 |
| ndk      | NEIS1244 |
| NEIS0007 | NEIS0007 |
| NEIS0008 | NEIS0008 |
| NEIS0009 | NEIS0009 |
| NEIS0011 | NEIS0011 |
| NEIS0012 | NEIS0012 |
| NEIS0013 | NEIS0013 |
| NEIS0014 | NEIS0014 |
| NEIS0017 | NEIS0017 |
| NEIS0018 | NEIS0018 |
| NEIS0019 | NEIS0019 |
| NEIS0024 | NEIS0024 |
| NEIS0034 | NEIS0034 |
| NEIS0037 | NEIS0037 |
| NEIS0038 | NEIS0038 |
| NEIS0039 | NEIS0039 |
| NEIS0040 | NEIS0040 |
| NEIS0041 | NEIS0041 |
| NEIS0043 | NEIS0043 |
| NEIS0044 | NEIS0044 |
| NEIS0069 | NEIS0069 |
| NEIS0071 | NEIS0071 |
| NEIS0072 | NEIS0072 |
| NEIS0092 | NEIS0092 |
| NEIS0093 | NEIS0093 |
| NEIS0094 | NEIS0094 |
| NEIS0097 | NEIS0097 |
| NEIS0098 | NEIS0098 |
| NEIS0099 | NEIS0099 |
| NEIS0100 | NEIS0100 |
| NEIS0101 | NEIS0101 |
| NEIS0102 | NEIS0102 |
| NEIS0103 | NEIS0103 |
| NEIS0106 | NEIS0106 |
| NEIS0107 | NEIS0107 |

|          |          |
|----------|----------|
| NEIS0108 | NEIS0108 |
| NEIS0109 | NEIS0109 |
| NEIS0110 | NEIS0110 |
| NEIS0114 | NEIS0114 |
| NEIS0115 | NEIS0115 |
| NEIS0124 | NEIS0124 |
| NEIS0152 | NEIS0152 |
| NEIS0158 | NEIS0158 |
| NEIS0160 | NEIS0160 |
| NEIS0162 | NEIS0162 |
| NEIS0164 | NEIS0164 |
| NEIS0167 | NEIS0167 |
| NEIS0170 | NEIS0170 |
| ompH     | NEIS0172 |
| NEIS0174 | NEIS0174 |
| NEIS0175 | NEIS0175 |
| NEIS0176 | NEIS0176 |
| NEIS0177 | NEIS0177 |
| NEIS0178 | NEIS0178 |
| NEIS0179 | NEIS0179 |
| NEIS0180 | NEIS0180 |
| NEIS0181 | NEIS0181 |
| NEIS0182 | NEIS0182 |
| NEIS0183 | NEIS0183 |
| NEIS0184 | NEIS0184 |
| NEIS0185 | NEIS0185 |
| NEIS0186 | NEIS0186 |
| NEIS0187 | NEIS0187 |
| NEIS0190 | NEIS0190 |
| NEIS0194 | NEIS0194 |
| NEIS0195 | NEIS0195 |
| NEIS0196 | NEIS0196 |
| NEIS0198 | NEIS0198 |
| NEIS0200 | NEIS0200 |
| NEIS0201 | NEIS0201 |
| NEIS0202 | NEIS0202 |
| NEIS0203 | NEIS0203 |
| NEIS0205 | NEIS0205 |
| NEIS0206 | NEIS0206 |
| NEIS0207 | NEIS0207 |
| NEIS0211 | NEIS0211 |
| NEIS0212 | NEIS0212 |
| NEIS0216 | NEIS0216 |
| NEIS0217 | NEIS0217 |
| NEIS0218 | NEIS0218 |
| NEIS0222 | NEIS0222 |
| NEIS0224 | NEIS0224 |

|          |          |
|----------|----------|
| NEIS0230 | NEIS0230 |
| NEIS0237 | NEIS0237 |
| NEIS0239 | NEIS0239 |
| NEIS0240 | NEIS0240 |
| NEIS0241 | NEIS0241 |
| NEIS0242 | NEIS0242 |
| NEIS0244 | NEIS0244 |
| NEIS0245 | NEIS0245 |
| NEIS0246 | NEIS0246 |
| NEIS0247 | NEIS0247 |
| NEIS0248 | NEIS0248 |
| NEIS0251 | NEIS0251 |
| NEIS0252 | NEIS0252 |
| NEIS0253 | NEIS0253 |
| NEIS0254 | NEIS0254 |
| NEIS0255 | NEIS0255 |
| NEIS0257 | NEIS0257 |
| NEIS0258 | NEIS0258 |
| NEIS0259 | NEIS0259 |
| NEIS0260 | NEIS0260 |
| NEIS0261 | NEIS0261 |
| NEIS0262 | NEIS0262 |
| NEIS0265 | NEIS0265 |
| NEIS0269 | NEIS0269 |
| NEIS0270 | NEIS0270 |
| NEIS0271 | NEIS0271 |
| NEIS0272 | NEIS0272 |
| NEIS0274 | NEIS0274 |
| NEIS0276 | NEIS0276 |
| NEIS0288 | NEIS0288 |
| NEIS0289 | NEIS0289 |
| NEIS0290 | NEIS0290 |
| NEIS0292 | NEIS0292 |
| NEIS0293 | NEIS0293 |
| NEIS0302 | NEIS0302 |
| NEIS0303 | NEIS0303 |
| NEIS0305 | NEIS0305 |
| NEIS0306 | NEIS0306 |
| NEIS0307 | NEIS0307 |
| NEIS0309 | NEIS0309 |
| NEIS0310 | NEIS0310 |
| NEIS0311 | NEIS0311 |
| NEIS0313 | NEIS0313 |
| NEIS0314 | NEIS0314 |
| NEIS0315 | NEIS0315 |
| NEIS0316 | NEIS0316 |
| NEIS0317 | NEIS0317 |

|          |          |
|----------|----------|
| NEIS0318 | NEIS0318 |
| NEIS0320 | NEIS0320 |
| NEIS0324 | NEIS0324 |
| NEIS0326 | NEIS0326 |
| NEIS0331 | NEIS0331 |
| NEIS0332 | NEIS0332 |
| NEIS0333 | NEIS0333 |
| NEIS0334 | NEIS0334 |
| NEIS0335 | NEIS0335 |
| NEIS0336 | NEIS0336 |
| NEIS0337 | NEIS0337 |
| NEIS0338 | NEIS0338 |
| NEIS0339 | NEIS0339 |
| NEIS0341 | NEIS0341 |
| NEIS0342 | NEIS0342 |
| NEIS0343 | NEIS0343 |
| NEIS0344 | NEIS0344 |
| NEIS0345 | NEIS0345 |
| NEIS0346 | NEIS0346 |
| NEIS0347 | NEIS0347 |
| NEIS0348 | NEIS0348 |
| NEIS0351 | NEIS0351 |
| NEIS0352 | NEIS0352 |
| NEIS0353 | NEIS0353 |
| NEIS0354 | NEIS0354 |
| NEIS0355 | NEIS0355 |
| NEIS0356 | NEIS0356 |
| NEIS0357 | NEIS0357 |
| NEIS0360 | NEIS0360 |
| NEIS0361 | NEIS0361 |
| NEIS0362 | NEIS0362 |
| NEIS0367 | NEIS0367 |
| NEIS0370 | NEIS0370 |
| NEIS0372 | NEIS0372 |
| NEIS0373 | NEIS0373 |
| NEIS0374 | NEIS0374 |
| NEIS0375 | NEIS0375 |
| NEIS0376 | NEIS0376 |
| NEIS0377 | NEIS0377 |
| NEIS0378 | NEIS0378 |
| NEIS0381 | NEIS0381 |
| NEIS0382 | NEIS0382 |
| NEIS0383 | NEIS0383 |
| NEIS0385 | NEIS0385 |
| NEIS0386 | NEIS0386 |
| NEIS0388 | NEIS0388 |
| NEIS0389 | NEIS0389 |

|          |          |
|----------|----------|
| NEIS0390 | NEIS0390 |
| NEIS0394 | NEIS0394 |
| NEIS0395 | NEIS0395 |
| NEIS0403 | NEIS0403 |
| NEIS0404 | NEIS0404 |
| NEIS0405 | NEIS0405 |
| NEIS0406 | NEIS0406 |
| NEIS0407 | NEIS0407 |
| NEIS0415 | NEIS0415 |
| NEIS0416 | NEIS0416 |
| NEIS0417 | NEIS0417 |
| NEIS0418 | NEIS0418 |
| NEIS0422 | NEIS0422 |
| NEIS0425 | NEIS0425 |
| NEIS0426 | NEIS0426 |
| NEIS0427 | NEIS0427 |
| NEIS0428 | NEIS0428 |
| NEIS0431 | NEIS0431 |
| secB     | NEIS0432 |
| NEIS0433 | NEIS0433 |
| NEIS0434 | NEIS0434 |
| NEIS0435 | NEIS0435 |
| NEIS0436 | NEIS0436 |
| NEIS0437 | NEIS0437 |
| NEIS0439 | NEIS0439 |
| NEIS0462 | NEIS0462 |
| NEIS0464 | NEIS0464 |
| NEIS0465 | NEIS0465 |
| NEIS0466 | NEIS0466 |
| NEIS0467 | NEIS0467 |
| NEIS0468 | NEIS0468 |
| NEIS0470 | NEIS0470 |
| NEIS0471 | NEIS0471 |
| NEIS0472 | NEIS0472 |
| NEIS0473 | NEIS0473 |
| NEIS0474 | NEIS0474 |
| NEIS0475 | NEIS0475 |
| NEIS0476 | NEIS0476 |
| NEIS0477 | NEIS0477 |
| NEIS0478 | NEIS0478 |
| NEIS0480 | NEIS0480 |
| NEIS0481 | NEIS0481 |
| NEIS0482 | NEIS0482 |
| NEIS0484 | NEIS0484 |
| dsbC     | NEIS0490 |
| NEIS0491 | NEIS0491 |
| dnaK     | NEIS0495 |

|          |          |
|----------|----------|
| NEIS0496 | NEIS0496 |
| NEIS0497 | NEIS0497 |
| NEIS0498 | NEIS0498 |
| NEIS0499 | NEIS0499 |
| NEIS0500 | NEIS0500 |
| NEIS0501 | NEIS0501 |
| NEIS0502 | NEIS0502 |
| NEIS0503 | NEIS0503 |
| NEIS0504 | NEIS0504 |
| NEIS0505 | NEIS0505 |
| NEIS0506 | NEIS0506 |
| NEIS0507 | NEIS0507 |
| NEIS0508 | NEIS0508 |
| NEIS0509 | NEIS0509 |
| NEIS0510 | NEIS0510 |
| NEIS0512 | NEIS0512 |
| NEIS0513 | NEIS0513 |
| NEIS0514 | NEIS0514 |
| NEIS0515 | NEIS0515 |
| NEIS0516 | NEIS0516 |
| NEIS0517 | NEIS0517 |
| NEIS0518 | NEIS0518 |
| NEIS0521 | NEIS0521 |
| NEIS0522 | NEIS0522 |
| NEIS0523 | NEIS0523 |
| NEIS0528 | NEIS0528 |
| NEIS0529 | NEIS0529 |
| NEIS0530 | NEIS0530 |
| NEIS0532 | NEIS0532 |
| NEIS0533 | NEIS0533 |
| NEIS0536 | NEIS0536 |
| NEIS0537 | NEIS0537 |
| NEIS0540 | NEIS0540 |
| NEIS0541 | NEIS0541 |
| NEIS0542 | NEIS0542 |
| NEIS0543 | NEIS0543 |
| NEIS0545 | NEIS0545 |
| NEIS0547 | NEIS0547 |
| NEIS0548 | NEIS0548 |
| NEIS0549 | NEIS0549 |
| NEIS0550 | NEIS0550 |
| NEIS0551 | NEIS0551 |
| NEIS0553 | NEIS0553 |
| NEIS0554 | NEIS0554 |
| NEIS0555 | NEIS0555 |
| NEIS0556 | NEIS0556 |
| NEIS0557 | NEIS0557 |



|          |          |
|----------|----------|
| NEIS0560 | NEIS0560 |
| NEIS0561 | NEIS0561 |
| NEIS0562 | NEIS0562 |
| NEIS0563 | NEIS0563 |
| NEIS0565 | NEIS0565 |
| lolB     | NEIS0566 |
| NEIS0569 | NEIS0569 |
| NEIS0570 | NEIS0570 |
| NEIS0571 | NEIS0571 |
| NEIS0572 | NEIS0572 |
| NEIS0573 | NEIS0573 |
| NEIS0574 | NEIS0574 |
| pta      | NEIS0575 |
| NEIS0576 | NEIS0576 |
| NEIS0577 | NEIS0577 |
| fbpA     | NEIS0578 |
| NEIS0582 | NEIS0582 |
| NEIS0583 | NEIS0583 |
| NEIS0584 | NEIS0584 |
| NEIS0591 | NEIS0591 |
| NEIS0593 | NEIS0593 |
| NEIS0607 | NEIS0607 |
| NEIS0611 | NEIS0611 |
| nspA     | NEIS0612 |
| NEIS0613 | NEIS0613 |
| NEIS0614 | NEIS0614 |
| NEIS0615 | NEIS0615 |
| NEIS0618 | NEIS0618 |
| NEIS0619 | NEIS0619 |
| NEIS0622 | NEIS0622 |
| NEIS0623 | NEIS0623 |
| NEIS0625 | NEIS0625 |
| NEIS0628 | NEIS0628 |
| NEIS0629 | NEIS0629 |
| NEIS0630 | NEIS0630 |
| NEIS0631 | NEIS0631 |
| NEIS0633 | NEIS0633 |
| NEIS0634 | NEIS0634 |
| NEIS0635 | NEIS0635 |
| NEIS0636 | NEIS0636 |
| NEIS0638 | NEIS0638 |
| NEIS0639 | NEIS0639 |
| NEIS0640 | NEIS0640 |
| NEIS0641 | NEIS0641 |
| NEIS0642 | NEIS0642 |
| NEIS0643 | NEIS0643 |
| NEIS0644 | NEIS0644 |

|          |          |
|----------|----------|
| NEIS0645 | NEIS0645 |
| NEIS0646 | NEIS0646 |
| NEIS0647 | NEIS0647 |
| NEIS0648 | NEIS0648 |
| NEIS0649 | NEIS0649 |
| NEIS0650 | NEIS0650 |
| NEIS0651 | NEIS0651 |
| NEIS0652 | NEIS0652 |
| comL     | NEIS0653 |
| NEIS0654 | NEIS0654 |
| NEIS0656 | NEIS0656 |
| NEIS0658 | NEIS0658 |
| NEIS0659 | NEIS0659 |
| NEIS0660 | NEIS0660 |
| NEIS0661 | NEIS0661 |
| NEIS0663 | NEIS0663 |
| NEIS0664 | NEIS0664 |
| NEIS0665 | NEIS0665 |
| NEIS0667 | NEIS0667 |
| NEIS0668 | NEIS0668 |
| NEIS0669 | NEIS0669 |
| NEIS0671 | NEIS0671 |
| NEIS0672 | NEIS0672 |
| NEIS0676 | NEIS0676 |
| NEIS0681 | NEIS0681 |
| NEIS0682 | NEIS0682 |
| NEIS0684 | NEIS0684 |
| NEIS0685 | NEIS0685 |
| NEIS0686 | NEIS0686 |
| NEIS0688 | NEIS0688 |
| NEIS0689 | NEIS0689 |
| NEIS0690 | NEIS0690 |
| NEIS0694 | NEIS0694 |
| NEIS0695 | NEIS0695 |
| NEIS0696 | NEIS0696 |
| NEIS0697 | NEIS0697 |
| NEIS0698 | NEIS0698 |
| NEIS0699 | NEIS0699 |
| NEIS0700 | NEIS0700 |
| NEIS0703 | NEIS0703 |
| NEIS0704 | NEIS0704 |
| NEIS0705 | NEIS0705 |
| NEIS0706 | NEIS0706 |
| NEIS0707 | NEIS0707 |
| NEIS0708 | NEIS0708 |
| NEIS0709 | NEIS0709 |
| pnp      | NEIS0710 |

|          |          |
|----------|----------|
| NEIS0711 | NEIS0711 |
| NEIS0712 | NEIS0712 |
| NEIS0713 | NEIS0713 |
| NEIS0714 | NEIS0714 |
| cysK     | NEIS0715 |
| NEIS0718 | NEIS0718 |
| NEIS0719 | NEIS0719 |
| NEIS0720 | NEIS0720 |
| NEIS0722 | NEIS0722 |
| NEIS0724 | NEIS0724 |
| NEIS0726 | NEIS0726 |
| NEIS0727 | NEIS0727 |
| NEIS0728 | NEIS0728 |
| NEIS0729 | NEIS0729 |
| NEIS0730 | NEIS0730 |
| NEIS0731 | NEIS0731 |
| NEIS0732 | NEIS0732 |
| NEIS0733 | NEIS0733 |
| NEIS0734 | NEIS0734 |
| NEIS0735 | NEIS0735 |
| NEIS0736 | NEIS0736 |
| NEIS0737 | NEIS0737 |
| NEIS0738 | NEIS0738 |
| NEIS0739 | NEIS0739 |
| NEIS0741 | NEIS0741 |
| NEIS0742 | NEIS0742 |
| NEIS0744 | NEIS0744 |
| NEIS0745 | NEIS0745 |
| NEIS0746 | NEIS0746 |
| NEIS0747 | NEIS0747 |
| NEIS0748 | NEIS0748 |
| NEIS0749 | NEIS0749 |
| NEIS0750 | NEIS0750 |
| NEIS0751 | NEIS0751 |
| NEIS0752 | NEIS0752 |
| NEIS0753 | NEIS0753 |
| NEIS0754 | NEIS0754 |
| NEIS0755 | NEIS0755 |
| NEIS0756 | NEIS0756 |
| NEIS0757 | NEIS0757 |
| NEIS0758 | NEIS0758 |
| NEIS0759 | NEIS0759 |
| NEIS0760 | NEIS0760 |
| NEIS0761 | NEIS0761 |
| NEIS0762 | NEIS0762 |
| NEIS0765 | NEIS0765 |
| NEIS0766 | NEIS0766 |

|          |          |
|----------|----------|
| NEIS0768 | NEIS0768 |
| NEIS0774 | NEIS0774 |
| NEIS0776 | NEIS0776 |
| NEIS0777 | NEIS0777 |
| NEIS0778 | NEIS0778 |
| NEIS0779 | NEIS0779 |
| NEIS0780 | NEIS0780 |
| NEIS0781 | NEIS0781 |
| NEIS0782 | NEIS0782 |
| NEIS0784 | NEIS0784 |
| NEIS0788 | NEIS0788 |
| NEIS0789 | NEIS0789 |
| NEIS0790 | NEIS0790 |
| NEIS0791 | NEIS0791 |
| NEIS0792 | NEIS0792 |
| NEIS0793 | NEIS0793 |
| NEIS0794 | NEIS0794 |
| NEIS0796 | NEIS0796 |
| NEIS0798 | NEIS0798 |
| NEIS0800 | NEIS0800 |
| NEIS0802 | NEIS0802 |
| NEIS0803 | NEIS0803 |
| NEIS0807 | NEIS0807 |
| NEIS0808 | NEIS0808 |
| NEIS0809 | NEIS0809 |
| NEIS0810 | NEIS0810 |
| NEIS0811 | NEIS0811 |
| NEIS0812 | NEIS0812 |
| NEIS0813 | NEIS0813 |
| loIB_2   | NEIS0814 |
| NEIS0815 | NEIS0815 |
| NEIS0818 | NEIS0818 |
| NEIS0819 | NEIS0819 |
| NEIS0820 | NEIS0820 |
| NEIS0821 | NEIS0821 |
| NEIS0823 | NEIS0823 |
| NEIS0824 | NEIS0824 |
| NEIS0826 | NEIS0826 |
| NEIS0833 | NEIS0833 |
| NEIS0834 | NEIS0834 |
| NEIS0835 | NEIS0835 |
| NEIS0836 | NEIS0836 |
| NEIS0839 | NEIS0839 |
| NEIS0900 | NEIS0900 |
| NEIS0901 | NEIS0901 |
| NEIS0902 | NEIS0902 |
| NEIS0906 | NEIS0906 |

|          |          |
|----------|----------|
| NEIS0907 | NEIS0907 |
| NEIS0908 | NEIS0908 |
| NEIS0909 | NEIS0909 |
| NEIS0910 | NEIS0910 |
| NEIS0911 | NEIS0911 |
| NEIS0912 | NEIS0912 |
| NEIS0915 | NEIS0915 |
| NEIS0917 | NEIS0917 |
| NEIS0919 | NEIS0919 |
| NEIS0920 | NEIS0920 |
| metF     | NEIS0921 |
| metH     | NEIS0922 |
| NEIS0929 | NEIS0929 |
| NEIS0933 | NEIS0933 |
| NEIS0934 | NEIS0934 |
| NEIS0941 | NEIS0941 |
| NEIS0942 | NEIS0942 |
| NEIS0947 | NEIS0947 |
| NEIS0948 | NEIS0948 |
| NEIS0949 | NEIS0949 |
| NEIS0951 | NEIS0951 |
| NEIS0952 | NEIS0952 |
| NEIS0953 | NEIS0953 |
| NEIS0954 | NEIS0954 |
| NEIS0958 | NEIS0958 |
| NEIS0959 | NEIS0959 |
| NEIS0960 | NEIS0960 |
| NEIS0961 | NEIS0961 |
| NEIS0963 | NEIS0963 |
| NEIS0980 | NEIS0980 |
| NEIS0981 | NEIS0981 |
| NEIS0982 | NEIS0982 |
| NEIS0983 | NEIS0983 |
| NEIS0984 | NEIS0984 |
| NEIS0985 | NEIS0985 |
| NEIS0986 | NEIS0986 |
| NEIS0995 | NEIS0995 |
| NEIS1005 | NEIS1005 |
| NEIS1007 | NEIS1007 |
| NEIS1010 | NEIS1010 |
| NEIS1011 | NEIS1011 |
| NEIS1013 | NEIS1013 |
| NEIS1016 | NEIS1016 |
| NEIS1017 | NEIS1017 |
| NEIS1024 | NEIS1024 |
| NEIS1026 | NEIS1026 |
| NEIS1028 | NEIS1028 |

|          |          |
|----------|----------|
| NEIS1029 | NEIS1029 |
| NEIS1030 | NEIS1030 |
| NEIS1031 | NEIS1031 |
| NEIS1032 | NEIS1032 |
| NEIS1034 | NEIS1034 |
| NEIS1035 | NEIS1035 |
| NEIS1036 | NEIS1036 |
| NEIS1037 | NEIS1037 |
| NEIS1038 | NEIS1038 |
| NEIS1039 | NEIS1039 |
| NEIS1040 | NEIS1040 |
| NEIS1041 | NEIS1041 |
| NEIS1063 | NEIS1063 |
| NEIS1066 | NEIS1066 |
| NEIS1067 | NEIS1067 |
| NEIS1068 | NEIS1068 |
| NEIS1069 | NEIS1069 |
| NEIS1071 | NEIS1071 |
| NEIS1072 | NEIS1072 |
| NEIS1073 | NEIS1073 |
| NEIS1076 | NEIS1076 |
| NEIS1077 | NEIS1077 |
| NEIS1078 | NEIS1078 |
| NEIS1080 | NEIS1080 |
| NEIS1081 | NEIS1081 |
| NEIS1082 | NEIS1082 |
| NEIS1083 | NEIS1083 |
| NEIS1084 | NEIS1084 |
| NEIS1085 | NEIS1085 |
| NEIS1087 | NEIS1087 |
| NEIS1088 | NEIS1088 |
| NEIS1090 | NEIS1090 |
| NEIS1097 | NEIS1097 |
| NEIS1098 | NEIS1098 |
| NEIS1099 | NEIS1099 |
| NEIS1102 | NEIS1102 |
| NEIS1103 | NEIS1103 |
| NEIS1104 | NEIS1104 |
| NEIS1106 | NEIS1106 |
| NEIS1107 | NEIS1107 |
| NEIS1108 | NEIS1108 |
| NEIS1112 | NEIS1112 |
| NEIS1113 | NEIS1113 |
| NEIS1114 | NEIS1114 |
| NEIS1115 | NEIS1115 |
| NEIS1116 | NEIS1116 |
| NEIS1125 | NEIS1125 |

|          |          |
|----------|----------|
| NEIS1126 | NEIS1126 |
| NEIS1127 | NEIS1127 |
| NEIS1128 | NEIS1128 |
| NEIS1129 | NEIS1129 |
| NEIS1130 | NEIS1130 |
| NEIS1131 | NEIS1131 |
| NEIS1133 | NEIS1133 |
| NEIS1134 | NEIS1134 |
| NEIS1135 | NEIS1135 |
| NEIS1136 | NEIS1136 |
| NEIS1137 | NEIS1137 |
| NEIS1138 | NEIS1138 |
| NEIS1139 | NEIS1139 |
| NEIS1140 | NEIS1140 |
| NEIS1142 | NEIS1142 |
| NEIS1143 | NEIS1143 |
| NEIS1144 | NEIS1144 |
| NEIS1145 | NEIS1145 |
| NEIS1146 | NEIS1146 |
| NEIS1147 | NEIS1147 |
| NEIS1148 | NEIS1148 |
| NEIS1149 | NEIS1149 |
| NEIS1150 | NEIS1150 |
| NEIS1151 | NEIS1151 |
| NEIS1152 | NEIS1152 |
| NEIS1154 | NEIS1154 |
| NEIS1155 | NEIS1155 |
| NEIS1157 | NEIS1157 |
| NEIS1158 | NEIS1158 |
| NEIS1159 | NEIS1159 |
| NEIS1164 | NEIS1164 |
| NEIS1165 | NEIS1165 |
| NEIS1166 | NEIS1166 |
| NEIS1168 | NEIS1168 |
| NEIS1170 | NEIS1170 |
| NEIS1171 | NEIS1171 |
| NEIS1172 | NEIS1172 |
| NEIS1173 | NEIS1173 |
| NEIS1174 | NEIS1174 |
| NEIS1175 | NEIS1175 |
| NEIS1179 | NEIS1179 |
| NEIS1180 | NEIS1180 |
| NEIS1181 | NEIS1181 |
| NEIS1182 | NEIS1182 |
| NEIS1186 | NEIS1186 |
| NEIS1188 | NEIS1188 |
| NEIS1189 | NEIS1189 |

|          |          |
|----------|----------|
| NEIS1190 | NEIS1190 |
| NEIS1191 | NEIS1191 |
| NEIS1192 | NEIS1192 |
| NEIS1198 | NEIS1198 |
| NEIS1199 | NEIS1199 |
| NEIS1200 | NEIS1200 |
| NEIS1201 | NEIS1201 |
| NEIS1202 | NEIS1202 |
| NEIS1207 | NEIS1207 |
| NEIS1208 | NEIS1208 |
| NEIS1210 | NEIS1210 |
| NEIS1212 | NEIS1212 |
| NEIS1213 | NEIS1213 |
| NEIS1214 | NEIS1214 |
| NEIS1219 | NEIS1219 |
| NEIS1221 | NEIS1221 |
| NEIS1222 | NEIS1222 |
| NEIS1223 | NEIS1223 |
| NEIS1226 | NEIS1226 |
| NEIS1229 | NEIS1229 |
| NEIS1231 | NEIS1231 |
| NEIS1232 | NEIS1232 |
| NEIS1233 | NEIS1233 |
| NEIS1234 | NEIS1234 |
| NEIS1235 | NEIS1235 |
| NEIS1239 | NEIS1239 |
| NEIS1240 | NEIS1240 |
| NEIS1242 | NEIS1242 |
| NEIS1243 | NEIS1243 |
| NEIS1247 | NEIS1247 |
| NEIS1248 | NEIS1248 |
| tig      | NEIS1250 |
| NEIS1251 | NEIS1251 |
| NEIS1252 | NEIS1252 |
| NEIS1253 | NEIS1253 |
| NEIS1254 | NEIS1254 |
| NEIS1255 | NEIS1255 |
| NEIS1256 | NEIS1256 |
| NEIS1259 | NEIS1259 |
| NEIS1261 | NEIS1261 |
| NEIS1263 | NEIS1263 |
| NEIS1267 | NEIS1267 |
| NEIS1269 | NEIS1269 |
| NEIS1270 | NEIS1270 |
| NEIS1273 | NEIS1273 |
| NEIS1274 | NEIS1274 |
| NEIS1275 | NEIS1275 |



|          |          |
|----------|----------|
| NEIS1276 | NEIS1276 |
| NEIS1277 | NEIS1277 |
| NEIS1281 | NEIS1281 |
| NEIS1283 | NEIS1283 |
| NEIS1284 | NEIS1284 |
| NEIS1285 | NEIS1285 |
| NEIS1286 | NEIS1286 |
| NEIS1287 | NEIS1287 |
| NEIS1288 | NEIS1288 |
| NEIS1289 | NEIS1289 |
| NEIS1291 | NEIS1291 |
| NEIS1292 | NEIS1292 |
| NEIS1293 | NEIS1293 |
| NEIS1294 | NEIS1294 |
| NEIS1295 | NEIS1295 |
| NEIS1296 | NEIS1296 |
| NEIS1297 | NEIS1297 |
| NEIS1298 | NEIS1298 |
| NEIS1299 | NEIS1299 |
| NEIS1300 | NEIS1300 |
| NEIS1301 | NEIS1301 |
| NEIS1302 | NEIS1302 |
| NEIS1303 | NEIS1303 |
| NEIS1304 | NEIS1304 |
| NEIS1306 | NEIS1306 |
| NEIS1307 | NEIS1307 |
| NEIS1308 | NEIS1308 |
| NEIS1309 | NEIS1309 |
| NEIS1312 | NEIS1312 |
| NEIS1314 | NEIS1314 |
| NEIS1315 | NEIS1315 |
| NEIS1317 | NEIS1317 |
| NEIS1318 | NEIS1318 |
| NEIS1325 | NEIS1325 |
| NEIS1328 | NEIS1328 |
| NEIS1329 | NEIS1329 |
| NEIS1332 | NEIS1332 |
| NEIS1333 | NEIS1333 |
| NEIS1334 | NEIS1334 |
| NEIS1347 | NEIS1347 |
| NEIS1348 | NEIS1348 |
| NEIS1352 | NEIS1352 |
| NEIS1354 | NEIS1354 |
| NEIS1355 | NEIS1355 |
| NEIS1361 | NEIS1361 |
| NEIS1362 | NEIS1362 |
| NEIS1363 | NEIS1363 |

|          |          |
|----------|----------|
| NEIS1365 | NEIS1365 |
| NEIS1366 | NEIS1366 |
| NEIS1367 | NEIS1367 |
| NEIS1368 | NEIS1368 |
| NEIS1370 | NEIS1370 |
| NEIS1371 | NEIS1371 |
| NEIS1372 | NEIS1372 |
| NEIS1373 | NEIS1373 |
| NEIS1374 | NEIS1374 |
| NEIS1375 | NEIS1375 |
| NEIS1376 | NEIS1376 |
| NEIS1378 | NEIS1378 |
| NEIS1379 | NEIS1379 |
| NEIS1380 | NEIS1380 |
| NEIS1382 | NEIS1382 |
| NEIS1383 | NEIS1383 |
| NEIS1385 | NEIS1385 |
| NEIS1386 | NEIS1386 |
| NEIS1389 | NEIS1389 |
| NEIS1392 | NEIS1392 |
| NEIS1393 | NEIS1393 |
| NEIS1394 | NEIS1394 |
| NEIS1395 | NEIS1395 |
| NEIS1397 | NEIS1397 |
| NEIS1398 | NEIS1398 |
| NEIS1400 | NEIS1400 |
| NEIS1401 | NEIS1401 |
| NEIS1402 | NEIS1402 |
| NEIS1404 | NEIS1404 |
| NEIS1405 | NEIS1405 |
| NEIS1407 | NEIS1407 |
| NEIS1408 | NEIS1408 |
| NEIS1409 | NEIS1409 |
| NEIS1410 | NEIS1410 |
| NEIS1411 | NEIS1411 |
| NEIS1412 | NEIS1412 |
| NEIS1414 | NEIS1414 |
| NEIS1417 | NEIS1417 |
| nlpD     | NEIS1418 |
| NEIS1419 | NEIS1419 |
| NEIS1420 | NEIS1420 |
| NEIS1422 | NEIS1422 |
| NEIS1423 | NEIS1423 |
| NEIS1424 | NEIS1424 |
| NEIS1425 | NEIS1425 |
| NEIS1426 | NEIS1426 |
| NEIS1429 | NEIS1429 |

|          |          |
|----------|----------|
| NEIS1430 | NEIS1430 |
| NEIS1431 | NEIS1431 |
| NEIS1432 | NEIS1432 |
| NEIS1433 | NEIS1433 |
| NEIS1435 | NEIS1435 |
| NEIS1436 | NEIS1436 |
| NEIS1437 | NEIS1437 |
| NEIS1439 | NEIS1439 |
| NEIS1441 | NEIS1441 |
| NEIS1442 | NEIS1442 |
| NEIS1444 | NEIS1444 |
| NEIS1445 | NEIS1445 |
| NEIS1446 | NEIS1446 |
| NEIS1447 | NEIS1447 |
| NEIS1448 | NEIS1448 |
| NEIS1449 | NEIS1449 |
| NEIS1450 | NEIS1450 |
| NEIS1451 | NEIS1451 |
| NEIS1452 | NEIS1452 |
| NEIS1453 | NEIS1453 |
| NEIS1455 | NEIS1455 |
| NEIS1457 | NEIS1457 |
| NEIS1458 | NEIS1458 |
| NEIS1459 | NEIS1459 |
| NEIS1460 | NEIS1460 |
| NEIS1461 | NEIS1461 |
| NEIS1462 | NEIS1462 |
| NEIS1464 | NEIS1464 |
| NEIS1465 | NEIS1465 |
| NEIS1466 | NEIS1466 |
| NEIS1471 | NEIS1471 |
| NEIS1472 | NEIS1472 |
| NEIS1473 | NEIS1473 |
| NEIS1474 | NEIS1474 |
| NEIS1475 | NEIS1475 |
| NEIS1477 | NEIS1477 |
| NEIS1478 | NEIS1478 |
| NEIS1479 | NEIS1479 |
| NEIS1480 | NEIS1480 |
| NEIS1481 | NEIS1481 |
| NEIS1483 | NEIS1483 |
| NEIS1485 | NEIS1485 |
| NEIS1486 | NEIS1486 |
| NEIS1488 | NEIS1488 |
| NEIS1489 | NEIS1489 |
| NEIS1490 | NEIS1490 |
| NEIS1491 | NEIS1491 |

|          |          |
|----------|----------|
| NEIS1493 | NEIS1493 |
| NEIS1494 | NEIS1494 |
| NEIS1495 | NEIS1495 |
| NEIS1496 | NEIS1496 |
| NEIS1497 | NEIS1497 |
| NEIS1498 | NEIS1498 |
| NEIS1499 | NEIS1499 |
| NEIS1500 | NEIS1500 |
| NEIS1501 | NEIS1501 |
| NEIS1502 | NEIS1502 |
| hisB     | NEIS1503 |
| NEIS1504 | NEIS1504 |
| NEIS1507 | NEIS1507 |
| NEIS1508 | NEIS1508 |
| NEIS1509 | NEIS1509 |
| NEIS1511 | NEIS1511 |
| NEIS1512 | NEIS1512 |
| NEIS1513 | NEIS1513 |
| NEIS1514 | NEIS1514 |
| NEIS1516 | NEIS1516 |
| NEIS1518 | NEIS1518 |
| NEIS1526 | NEIS1526 |
| NEIS1528 | NEIS1528 |
| NEIS1530 | NEIS1530 |
| NEIS1531 | NEIS1531 |
| NEIS1532 | NEIS1532 |
| NEIS1533 | NEIS1533 |
| NEIS1535 | NEIS1535 |
| NEIS1538 | NEIS1538 |
| NEIS1544 | NEIS1544 |
| NEIS1545 | NEIS1545 |
| NEIS1546 | NEIS1546 |
| NEIS1548 | NEIS1548 |
| NEIS1550 | NEIS1550 |
| NEIS1552 | NEIS1552 |
| NEIS1555 | NEIS1555 |
| NEIS1556 | NEIS1556 |
| NEIS1557 | NEIS1557 |
| NEIS1558 | NEIS1558 |
| NEIS1559 | NEIS1559 |
| NEIS1560 | NEIS1560 |
| NEIS1562 | NEIS1562 |
| NEIS1563 | NEIS1563 |
| NEIS1564 | NEIS1564 |
| NEIS1567 | NEIS1567 |
| NEIS1568 | NEIS1568 |
| NEIS1569 | NEIS1569 |

|          |          |
|----------|----------|
| NEIS1570 | NEIS1570 |
| NEIS1571 | NEIS1571 |
| NEIS1576 | NEIS1576 |
| NEIS1577 | NEIS1577 |
| NEIS1578 | NEIS1578 |
| NEIS1579 | NEIS1579 |
| NEIS1580 | NEIS1580 |
| NEIS1581 | NEIS1581 |
| NEIS1582 | NEIS1582 |
| NEIS1587 | NEIS1587 |
| NEIS1588 | NEIS1588 |
| NEIS1589 | NEIS1589 |
| NEIS1590 | NEIS1590 |
| NEIS1591 | NEIS1591 |
| NEIS1592 | NEIS1592 |
| NEIS1593 | NEIS1593 |
| NEIS1594 | NEIS1594 |
| NEIS1595 | NEIS1595 |
| NEIS1596 | NEIS1596 |
| NEIS1597 | NEIS1597 |
| NEIS1598 | NEIS1598 |
| NEIS1599 | NEIS1599 |
| NEIS1601 | NEIS1601 |
| NEIS1602 | NEIS1602 |
| NEIS1603 | NEIS1603 |
| NEIS1604 | NEIS1604 |
| NEIS1605 | NEIS1605 |
| NEIS1606 | NEIS1606 |
| NEIS1607 | NEIS1607 |
| NEIS1608 | NEIS1608 |
| NEIS1610 | NEIS1610 |
| NEIS1611 | NEIS1611 |
| NEIS1613 | NEIS1613 |
| NEIS1614 | NEIS1614 |
| NEIS1615 | NEIS1615 |
| NEIS1617 | NEIS1617 |
| NEIS1622 | NEIS1622 |
| NEIS1623 | NEIS1623 |
| NEIS1624 | NEIS1624 |
| gdhA     | NEIS1625 |
| NEIS1629 | NEIS1629 |
| NEIS1630 | NEIS1630 |
| NEIS1636 | NEIS1636 |
| NEIS1637 | NEIS1637 |
| NEIS1638 | NEIS1638 |
| NEIS1639 | NEIS1639 |
| NEIS1640 | NEIS1640 |

|          |          |
|----------|----------|
| NEIS1646 | NEIS1646 |
| NEIS1647 | NEIS1647 |
| NEIS1648 | NEIS1648 |
| NEIS1649 | NEIS1649 |
| NEIS1650 | NEIS1650 |
| NEIS1651 | NEIS1651 |
| NEIS1654 | NEIS1654 |
| NEIS1655 | NEIS1655 |
| NEIS1669 | NEIS1669 |
| NEIS1670 | NEIS1670 |
| NEIS1671 | NEIS1671 |
| NEIS1674 | NEIS1674 |
| NEIS1677 | NEIS1677 |
| NEIS1679 | NEIS1679 |
| NEIS1683 | NEIS1683 |
| NEIS1684 | NEIS1684 |
| NEIS1686 | NEIS1686 |
| NEIS1687 | NEIS1687 |
| NEIS1692 | NEIS1692 |
| NEIS1693 | NEIS1693 |
| NEIS1697 | NEIS1697 |
| NEIS1698 | NEIS1698 |
| NEIS1699 | NEIS1699 |
| NEIS1700 | NEIS1700 |
| NEIS1703 | NEIS1703 |
| NEIS1704 | NEIS1704 |
| NEIS1705 | NEIS1705 |
| NEIS1720 | NEIS1720 |
| NEIS1721 | NEIS1721 |
| NEIS1722 | NEIS1722 |
| NEIS1724 | NEIS1724 |
| NEIS1725 | NEIS1725 |
| NEIS1726 | NEIS1726 |
| NEIS1728 | NEIS1728 |
| NEIS1735 | NEIS1735 |
| ftsZ     | NEIS1737 |
| ftsA     | NEIS1738 |
| NEIS1739 | NEIS1739 |
| NEIS1740 | NEIS1740 |
| NEIS1741 | NEIS1741 |
| NEIS1742 | NEIS1742 |
| NEIS1743 | NEIS1743 |
| NEIS1745 | NEIS1745 |
| NEIS1746 | NEIS1746 |
| NEIS1747 | NEIS1747 |
| NEIS1748 | NEIS1748 |
| NEIS1749 | NEIS1749 |

|          |          |
|----------|----------|
| NEIS1750 | NEIS1750 |
| NEIS1751 | NEIS1751 |
| NEIS1754 | NEIS1754 |
| NEIS1755 | NEIS1755 |
| NEIS1756 | NEIS1756 |
| NEIS1757 | NEIS1757 |
| NEIS1759 | NEIS1759 |
| NEIS1762 | NEIS1762 |
| NEIS1763 | NEIS1763 |
| NEIS1764 | NEIS1764 |
| NEIS1765 | NEIS1765 |
| NEIS1768 | NEIS1768 |
| NEIS1770 | NEIS1770 |
| NEIS1771 | NEIS1771 |
| NEIS1772 | NEIS1772 |
| NEIS1773 | NEIS1773 |
| NEIS1780 | NEIS1780 |
| NEIS1781 | NEIS1781 |
| NEIS1782 | NEIS1782 |
| rmpM     | NEIS1783 |
| NEIS1784 | NEIS1784 |
| NEIS1785 | NEIS1785 |
| NEIS1786 | NEIS1786 |
| NEIS1787 | NEIS1787 |
| NEIS1804 | NEIS1804 |
| NEIS1807 | NEIS1807 |
| NEIS1819 | NEIS1819 |
| NEIS1820 | NEIS1820 |
| NEIS1822 | NEIS1822 |
| NEIS1823 | NEIS1823 |
| NEIS1824 | NEIS1824 |
| NEIS1825 | NEIS1825 |
| NEIS1826 | NEIS1826 |
| NEIS1827 | NEIS1827 |
| NEIS1828 | NEIS1828 |
| NEIS1831 | NEIS1831 |
| NEIS1832 | NEIS1832 |
| NEIS1833 | NEIS1833 |
| fabl     | NEIS1834 |
| NEIS1835 | NEIS1835 |
| NEIS1841 | NEIS1841 |
| NEIS1842 | NEIS1842 |
| NEIS1845 | NEIS1845 |
| NEIS1846 | NEIS1846 |
| NEIS1849 | NEIS1849 |
| NEIS1854 | NEIS1854 |
| NEIS1855 | NEIS1855 |

|          |          |
|----------|----------|
| NEIS1856 | NEIS1856 |
| NEIS1857 | NEIS1857 |
| NEIS1858 | NEIS1858 |
| NEIS1870 | NEIS1870 |
| NEIS1871 | NEIS1871 |
| NEIS1872 | NEIS1872 |
| NEIS1873 | NEIS1873 |
| NEIS1874 | NEIS1874 |
| NEIS1875 | NEIS1875 |
| NEIS1882 | NEIS1882 |
| NEIS1883 | NEIS1883 |
| NEIS1889 | NEIS1889 |
| NEIS1890 | NEIS1890 |
| NEIS1891 | NEIS1891 |
| NEIS1892 | NEIS1892 |
| NEIS1896 | NEIS1896 |
| NEIS1898 | NEIS1898 |
| NEIS1899 | NEIS1899 |
| NEIS1903 | NEIS1903 |
| NEIS1904 | NEIS1904 |
| NEIS1905 | NEIS1905 |
| NEIS1906 | NEIS1906 |
| NEIS1907 | NEIS1907 |
| NEIS1908 | NEIS1908 |
| NEIS1909 | NEIS1909 |
| NEIS1910 | NEIS1910 |
| NEIS1911 | NEIS1911 |
| NEIS1912 | NEIS1912 |
| NEIS1913 | NEIS1913 |
| NEIS1915 | NEIS1915 |
| NEIS1916 | NEIS1916 |
| metQ     | NEIS1917 |
| NEIS1918 | NEIS1918 |
| NEIS1919 | NEIS1919 |
| NEIS1920 | NEIS1920 |
| NEIS1922 | NEIS1922 |
| NEIS1926 | NEIS1926 |
| NEIS1927 | NEIS1927 |
| NEIS1930 | NEIS1930 |
| NEIS1931 | NEIS1931 |
| NEIS1932 | NEIS1932 |
| NEIS1933 | NEIS1933 |
| NEIS1934 | NEIS1934 |
| NEIS1935 | NEIS1935 |
| NEIS1936 | NEIS1936 |
| NEIS1937 | NEIS1937 |
| NEIS1938 | NEIS1938 |



|          |          |
|----------|----------|
| NEIS1944 | NEIS1944 |
| NEIS1945 | NEIS1945 |
| NEIS1948 | NEIS1948 |
| NEIS1949 | NEIS1949 |
| NEIS1951 | NEIS1951 |
| NEIS1952 | NEIS1952 |
| NEIS1953 | NEIS1953 |
| NEIS1954 | NEIS1954 |
| NEIS1955 | NEIS1955 |
| NEIS1956 | NEIS1956 |
| NEIS1957 | NEIS1957 |
| NEIS1958 | NEIS1958 |
| NEIS1962 | NEIS1962 |
| NEIS1964 | NEIS1964 |
| NEIS1965 | NEIS1965 |
| NEIS1966 | NEIS1966 |
| NEIS1967 | NEIS1967 |
| NEIS1968 | NEIS1968 |
| NEIS1971 | NEIS1971 |
| purL     | NEIS1972 |
| NEIS1973 | NEIS1973 |
| NEIS1976 | NEIS1976 |
| NEIS1977 | NEIS1977 |
| NEIS1978 | NEIS1978 |
| NEIS1979 | NEIS1979 |
| NEIS1980 | NEIS1980 |
| NEIS1981 | NEIS1981 |
| NEIS1982 | NEIS1982 |
| NEIS1983 | NEIS1983 |
| NEIS1984 | NEIS1984 |
| NEIS1987 | NEIS1987 |
| NEIS1999 | NEIS1999 |
| NEIS2000 | NEIS2000 |
| NEIS2001 | NEIS2001 |
| NEIS2002 | NEIS2002 |
| NEIS2003 | NEIS2003 |
| NEIS2004 | NEIS2004 |
| NEIS2005 | NEIS2005 |
| NEIS2007 | NEIS2007 |
| NEIS2008 | NEIS2008 |
| NEIS2009 | NEIS2009 |
| NEIS2010 | NEIS2010 |
| NEIS2015 | NEIS2015 |
| NEIS2016 | NEIS2016 |
| NEIS2017 | NEIS2017 |
| NEIS2021 | NEIS2021 |
| NEIS2022 | NEIS2022 |

|          |          |
|----------|----------|
| NEIS2023 | NEIS2023 |
| NEIS2024 | NEIS2024 |
| NEIS2025 | NEIS2025 |
| NEIS2026 | NEIS2026 |
| NEIS2027 | NEIS2027 |
| NEIS2028 | NEIS2028 |
| NEIS2029 | NEIS2029 |
| NEIS2030 | NEIS2030 |
| NEIS2032 | NEIS2032 |
| NEIS2033 | NEIS2033 |
| NEIS2034 | NEIS2034 |
| NEIS2035 | NEIS2035 |
| NEIS2036 | NEIS2036 |
| NEIS2039 | NEIS2039 |
| NEIS2040 | NEIS2040 |
| NEIS2041 | NEIS2041 |
| NEIS2044 | NEIS2044 |
| NEIS2045 | NEIS2045 |
| NEIS2047 | NEIS2047 |
| NEIS2048 | NEIS2048 |
| NEIS2049 | NEIS2049 |
| NEIS2050 | NEIS2050 |
| NEIS2051 | NEIS2051 |
| NEIS2052 | NEIS2052 |
| NEIS2053 | NEIS2053 |
| NEIS2054 | NEIS2054 |
| NEIS2056 | NEIS2056 |
| NEIS2057 | NEIS2057 |
| NEIS2058 | NEIS2058 |
| NEIS2059 | NEIS2059 |
| NEIS2060 | NEIS2060 |
| NEIS2062 | NEIS2062 |
| NEIS2065 | NEIS2065 |
| NEIS2071 | NEIS2071 |
| NEIS2072 | NEIS2072 |
| NEIS2073 | NEIS2073 |
| NEIS2074 | NEIS2074 |
| NEIS2075 | NEIS2075 |
| NEIS2076 | NEIS2076 |
| NEIS2077 | NEIS2077 |
| NEIS2078 | NEIS2078 |
| NEIS2079 | NEIS2079 |
| NEIS2081 | NEIS2081 |
| NEIS2099 | NEIS2099 |
| NEIS2101 | NEIS2101 |
| NEIS2103 | NEIS2103 |
| NEIS2104 | NEIS2104 |

|          |          |
|----------|----------|
| NEIS2106 | NEIS2106 |
| NEIS2110 | NEIS2110 |
| NEIS2112 | NEIS2112 |
| NEIS2113 | NEIS2113 |
| NEIS2114 | NEIS2114 |
| NEIS2116 | NEIS2116 |
| NEIS2118 | NEIS2118 |
| NEIS2119 | NEIS2119 |
| NEIS2120 | NEIS2120 |
| NEIS2121 | NEIS2121 |
| NEIS2123 | NEIS2123 |
| NEIS2124 | NEIS2124 |
| NEIS2128 | NEIS2128 |
| NEIS2129 | NEIS2129 |
| NEIS2130 | NEIS2130 |
| NEIS2131 | NEIS2131 |
| NEIS2132 | NEIS2132 |
| NEIS2135 | NEIS2135 |
| NEIS2136 | NEIS2136 |
| NEIS2138 | NEIS2138 |
| NEIS2139 | NEIS2139 |
| NEIS2140 | NEIS2140 |
| NEIS2141 | NEIS2141 |
| NEIS2142 | NEIS2142 |
| NEIS2143 | NEIS2143 |
| NEIS2144 | NEIS2144 |
| NEIS2145 | NEIS2145 |
| NEIS2146 | NEIS2146 |
| NEIS2147 | NEIS2147 |
| NEIS2149 | NEIS2149 |
| NEIS2150 | NEIS2150 |
| NEIS2151 | NEIS2151 |
| NEIS2153 | NEIS2153 |
| NEIS2361 | NEIS2361 |
| NEIS2365 | NEIS2365 |
| NEIS2366 | NEIS2366 |
| NEIS2375 | NEIS2375 |
| NEIS2392 | NEIS2392 |
| NEIS2393 | NEIS2393 |
| NEIS2399 | NEIS2399 |
| NEIS2405 | NEIS2405 |
| NEIS2446 | NEIS2446 |
| NEIS2447 | NEIS2447 |
| NEIS2448 | NEIS2448 |
| NEIS2458 | NEIS2458 |
| NEIS2477 | NEIS2477 |
| NEIS2485 | NEIS2485 |

|          |          |
|----------|----------|
| NEIS2494 | NEIS2494 |
| NEIS2519 | NEIS2519 |
| NEIS2522 | NEIS2522 |
| NEIS2526 | NEIS2526 |
| NEIS2530 | NEIS2530 |
| NEIS2552 | NEIS2552 |
| NEIS2553 | NEIS2553 |
| NEIS2558 | NEIS2558 |
| NEIS2580 | NEIS2580 |
| NEIS2583 | NEIS2583 |
| NEIS2668 | NEIS2668 |
| NEIS2682 | NEIS2682 |
| NEIS2755 | NEIS2755 |
| NEIS2789 | NEIS2789 |
| NEIS2852 | NEIS2852 |
| NEIS2859 | NEIS2859 |
| NEIS2910 | NEIS2910 |
| NEIS2975 | NEIS2975 |
| NEIS2976 | NEIS2976 |
| NEIS2979 | NEIS2979 |
| NEIS2982 | NEIS2982 |
| NEIS2984 | NEIS2984 |
| NEIS2985 | NEIS2985 |
| NEIS2988 | NEIS2988 |
| NEIS2997 | NEIS2997 |
| NEIS2999 | NEIS2999 |
| NEIS3000 | NEIS3000 |
| NEIS3004 | NEIS3004 |
| NEIS3005 | NEIS3005 |
| NEIS3006 | NEIS3006 |
| NEIS3008 | NEIS3008 |
| NEIS3010 | NEIS3010 |
| NEIS3014 | NEIS3014 |
| NEIS3019 | NEIS3019 |
| NEIS3025 | NEIS3025 |
| NEIS3026 | NEIS3026 |
| NEIS3028 | NEIS3028 |
| NEIS3029 | NEIS3029 |
| NEIS3040 | NEIS3040 |
| NEIS3044 | NEIS3044 |
| NEIS3051 | NEIS3051 |
| NEIS3052 | NEIS3052 |
| NEIS3059 | NEIS3059 |
| NEIS3062 | NEIS3062 |
| NEIS3072 | NEIS3072 |
| NEIS3082 | NEIS3082 |
| NEIS3083 | NEIS3083 |

|          |          |
|----------|----------|
| NEIS3088 | NEIS3088 |
| NEIS3093 | NEIS3093 |
| NEIS3098 | NEIS3098 |
| NEIS3099 | NEIS3099 |
| NEIS3100 | NEIS3100 |
| NEIS3102 | NEIS3102 |
| NEIS3106 | NEIS3106 |
| NEIS3107 | NEIS3107 |
| NEIS3110 | NEIS3110 |
| NEIS3114 | NEIS3114 |
| NEIS3123 | NEIS3123 |
| NEIS3126 | NEIS3126 |
| NEIS3133 | NEIS3133 |
| NEIS3134 | NEIS3134 |
| NEIS3138 | NEIS3138 |
| NEIS3139 | NEIS3139 |
| NEIS3140 | NEIS3140 |
| NEIS3141 | NEIS3141 |
| NEIS3145 | NEIS3145 |
| NEIS3146 | NEIS3146 |
| NEIS3148 | NEIS3148 |
| NEIS3160 | NEIS3160 |
| NEIS3161 | NEIS3161 |
| NEIS3164 | NEIS3164 |
| NEIS3168 | NEIS3168 |
| NEIS3169 | NEIS3169 |
| NEIS3170 | NEIS3170 |
| NEIS3172 | NEIS3172 |
| nhba     | NEIS2109 |
| norM     | NEIS0763 |
| ntpA     | NEIS0585 |
| nuoB     | NEIS0238 |
| nusG     | NEIS0118 |
| opcA     | NEIS2198 |
| ostA     | NEIS1813 |
| oxyR     | NEIS0163 |
| panD     | NEIS1216 |
| parC     | NEIS1525 |
| parE     | NEIS1600 |
| patA     | NEIS1203 |
| patB     | NEIS1204 |
| pdhC     | NEIS1278 |
| penA     | NEIS1753 |
| pgi1     | NEIS1326 |
| pgi2     | NEIS1837 |
| pgk      | NEIS2148 |
| pglC     | NEIS0379 |

|       |          |
|-------|----------|
| pglD  | NEIS0396 |
| pglE  | NEIS0568 |
| pglF  | NEIS0402 |
| pglI  | NEIS0380 |
| pglL  | NEIS0539 |
| pgm   | NEIS0743 |
| pgm2  | NEIS1776 |
| pilB  | NEIS0020 |
| pilD  | NEIS1839 |
| pilE  | NEIS0210 |
| pilF  | NEIS1844 |
| pilG  | NEIS1838 |
| pilI  | NEIS0828 |
| pilM  | NEIS0412 |
| pilN  | NEIS0411 |
| pilO  | NEIS0410 |
| pilP  | NEIS0409 |
| pilT1 | NEIS0036 |
| pilT2 | NEIS0721 |
| pilU  | NEIS0035 |
| pilV  | NEIS0487 |
| pilZ  | NEIS0723 |
| ponA  | NEIS0414 |
| proB  | NEIS1033 |
| prpB  | NEIS1733 |
| prpC  | NEIS1732 |
| putA  | NEIS1766 |
| pykA  | NEIS0074 |
| pyrH  | NEIS2082 |
| rbgA  | NEIS0692 |
| recX  | NEIS1415 |
| rfaC  | NEIS2134 |
| rfaF  | NEIS1456 |
| rfaK  | NEIS1619 |
| rfaA  | NEIS0046 |
| rfaB  | NEIS0047 |
| rfaC  | NEIS0045 |
| rlpB  | NEIS0657 |
| rnc   | NEIS0637 |
| rpiA  | NEIS1440 |
| rplA  | NEIS0120 |
| rplB  | NEIS0135 |
| rplC  | NEIS0132 |
| rplD  | NEIS0133 |
| rplE  | NEIS0144 |
| rplI  | NEIS1257 |
| rplJ  | NEIS0121 |

|      |          |
|------|----------|
| rplK | NEIS0119 |
| rplL | NEIS0122 |
| rplM | NEIS2038 |
| rplN | NEIS0142 |
| rplO | NEIS0151 |
| rplQ | NEIS0159 |
| rplR | NEIS0148 |
| rplS | NEIS0531 |
| rplT | NEIS0675 |
| rplU | NEIS1847 |
| rplV | NEIS0137 |
| rplW | NEIS0134 |
| rplX | NEIS0143 |
| rplY | NEIS0817 |
| rpmA | NEIS1848 |
| rpmB | NEIS1851 |
| rpmC | NEIS0140 |
| rpmD | NEIS0150 |
| rpmE | NEIS1928 |
| rpmF | NEIS0312 |
| rpmG | NEIS1850 |
| rpmH | NEIS0319 |
| rpmI | NEIS0674 |
| rpmJ | NEIS0154 |
| rpsA | NEIS1238 |
| rpsB | NEIS2080 |
| rpsC | NEIS0138 |
| rpsD | NEIS0157 |
| rpsE | NEIS0149 |
| rpsF | NEIS1260 |
| rpsG | NEIS0126 |
| rpsH | NEIS0146 |
| rpsI | NEIS2037 |
| rpsJ | NEIS0129 |
| rpsK | NEIS0156 |
| rpsL | NEIS0125 |
| rpsM | NEIS0155 |
| rpsN | NEIS0145 |
| rpsO | NEIS0552 |
| rpsP | NEIS0534 |
| rpsQ | NEIS0141 |
| rpsR | NEIS1258 |
| rpsS | NEIS0136 |
| rpsT | NEIS1688 |
| rpsU | NEIS1921 |
| sdhA | NEIS0927 |
| sdhB | NEIS0928 |

|          |          |
|----------|----------|
| sdhC     | NEIS0925 |
| sdhD     | NEIS0926 |
| secE     | NEIS0117 |
| sodB     | NEIS0825 |
| speA     | NEIS1682 |
| speB     | NEIS1680 |
| sucA     | NEIS0931 |
| sucB     | NEIS0932 |
| sucC     | NEIS0935 |
| sucD     | NEIS0936 |
| talA     | NEIS1818 |
| tbpB     | NEIS1691 |
| tex      | NEIS0059 |
| trkH     | NEIS0609 |
| tuf      | NEIS0116 |
| yhbG     | NEIS1812 |
| NEIS1195 | NEIS1195 |
| NEIS2661 | NEIS2661 |
| NEIS0493 | NEIS0493 |
| NEIS2108 | NEIS2108 |
| NEIS2391 | NEIS2391 |
| NEIS2462 | NEIS2462 |
| pglB     | NEIS0399 |
| fusA     | NEIS0127 |
| omp85    | NEIS0173 |
| NEIS0275 | NEIS0275 |
| NEIS1245 | NEIS1245 |
| NEIS3118 | NEIS3118 |
| NEIS0235 | NEIS0235 |
| NEIS0263 | NEIS0263 |
| NEIS0944 | NEIS0944 |
| NEIS0567 | NEIS0567 |
| NEIS0104 | NEIS0104 |
| NEIS1357 | NEIS1357 |
| NEIS1487 | NEIS1487 |
| NEIS0479 | NEIS0479 |
| NEIS3041 | NEIS3041 |
| NEIS0308 | NEIS0308 |
| NEIS1271 | NEIS1271 |
| NEIS1515 | NEIS1515 |
| NEIS0923 | NEIS0923 |
| NEIS1183 | NEIS1183 |
| NEIS1438 | NEIS1438 |
| NEIS0626 | NEIS0626 |
| NEIS0837 | NEIS0837 |
| NEIS2981 | NEIS2981 |
| NEIS0764 | NEIS0764 |



|          |          |
|----------|----------|
| NEIS1428 | NEIS1428 |
| prsA     | NEIS0816 |
| NEIS2930 | NEIS2930 |
| NEIS1110 | NEIS1110 |
| NEIS1176 | NEIS1176 |
| NEIS0358 | NEIS0358 |
| NEIS1059 | NEIS1059 |
| NEIS0123 | NEIS0123 |
| NEIS1196 | NEIS1196 |
| gapA2    | NEIS2137 |
| porB     | NEIS2020 |
| comP     | NEIS1995 |
| fetA     | NEIS1963 |
| lgtE     | NEIS1900 |
| glnA     | NEIS1809 |
| folP     | NEIS1609 |
| serC     | NEIS1554 |
| lbpB     | NEIS1469 |
| lbpA     | NEIS1468 |
| pip      | NEIS0905 |
| pilQ     | NEIS0408 |
| ppk      | NEIS0323 |
| pglA     | NEIS0213 |
| lpxB     | NEIS0191 |
