# Supplementary material
Source: PubMed Central journal article supplement (PMC6737241)
Supplement: mBio.01668-19-st002.pdf [file mBio.01668-19-st002.pdf]

|          |                      |           |            |          |            |           |            |           |            |
|----------|----------------------|-----------|------------|----------|------------|-----------|------------|-----------|------------|
| NEIS1367 | Putative lipoprotein | 96.1–96.6 | 96.2 ± 0.3 | 98.9–100 | 99.2 ± 0.4 | 97–98.3   | 97.5 ± 0.6 | 99.6–99.8 | 99.6 ± 0.1 |
| NEIS1271 | Hypothetical protein | 95.5–97.1 | 96.4 ± 0.4 | 97.3–100 | 99 ± 0.5   | 96.9–98.7 | 97.7 ± 0.4 | 97.8–99.9 | 99.3 ± 0.4 |
| NEIS1858 | Hypothetical protein | 92.4–99.1 | 94.5 ± 1.5 | 91.6–100 | 98.3 ± 1.9 | 95.5–99.6 | 96.4 ± 1.0 | 95.2–99.9 | 98.8 ± 1.3 |
| NEIS1945 | Hypothetical protein | 74.2–99.2 | 82.3 ± 8.3 | 74.0–100 | 93.5 ± 9.2 | 78.4–99.2 | 82.9 ± 7.9 | 79–99.9   | 94.1 ± 8.6 |
| NEIS1485 | Hypothetical protein | 97.3–100  | 97.7 ± 0.7 | 97.3–100 | 99 ± 0.9   | 97.6–99.8 | 98 ± 0.6   | 97.5–99.8 | 99.1 ± 0.9 |
| NEIS1546 | Hypothetical protein | 88.4–97.7 | 96.1 ± 2.2 | 87.0–100 | 97.9 ± 3.4 | 89.2–97.8 | 96.6 ± 1.4 | 89–99.9   | 98.4 ± 2.9 |
| NEIS1746 | Hypothetical protein | 62.7–87.7 | 67 ± 9.3   | 98.4–100 | 99 ± 0.5   | 67.8–80.9 | 71.2 ± 4.7 | 99.5–99.7 | 99.5 ± 0.1 |
| NEIS2446 | Hypothetical protein | 83.5–91.2 | 88.1 ± 2.4 | 90.1–100 | 96.5 ± 2.7 | 80.6–92   | 91 ± 3.8   | 91.5–99.9 | 97.3 ± 2.6 |
| NEIS0790 | Hypothetical protein | 74.6–80.6 | 76.7 ± 2.2 | 93–100   | 97.7 ± 2.6 | 82.5–89.4 | 85.9 ± 2.6 | 99.5–99.7 | 99.5 ± 0.1 |
| NEIS1136 | Hypothetical protein | 82.6–83.7 | 83.1 ± 0.5 | 97.8–100 | 98.9 ± 0.6 | 85.6–85.9 | 85.7 ± 0.3 | 99.3–99.6 | 99.4 ± 0.2 |
| NEIS1253 | Hypothetical protein | 91.9–97.5 | 93.4 ± 1.3 | 93.8–100 | 98.1 ± 1.5 | 94–98.1   | 94.6 ± 1.0 | 95.2–99.7 | 98.9 ± 1.4 |

|           |            |           |            |
|-----------|------------|-----------|------------|
| 97.2–97.7 | 97.3 ± 0.3 | 98.1–98.3 | 98.1 ± 0.1 |
| 95.6–97.1 | 96.4 ± 0.4 | 96.9–98.2 | 97.6 ± 0.3 |
| 92.2–99.8 | 94.5 ± 2.1 | 95.5–99.6 | 96.4 ± 1.0 |
| 74.2–99.4 | 82.8 ± 8.9 | 78.5–99.2 | 82.8 ± 7.8 |
| 97.3–99.1 | 97.7 ± 0.5 | 97.6–99.2 | 97.9 ± 0.5 |
| 88.1–97.4 | 96.1 ± 2.0 | 89.2–97.8 | 96.8 ± 1.7 |
| 50–79.3   | 61 ± 13.8  | 70.3–70.6 | 70.4 ± 0.1 |
| 100–100   | 100 ± 0.0  | 100–100   | 100 ± 0.0  |
| 71–75.3   | 72.3 ± 1.5 | 82.5–86.9 | 83.8 ± 1.8 |
| 100–100   | 100 ± 0.0  | 100–100   | 100 ± 0.0  |
| 100–100   | 100 ± 0.0  | 100–100   | 100 ± 0.0  |
