# Supplementary material
Source: PubMed Central journal article supplement (PMC6737241)
Supplement: mBio.01668-19-st003.pdf [file mBio.01668-19-st003.pdf]

**Accession number for 970 gonococcal isolates used in this study**

| <b>GCWGS-id</b> | <b>BioSample</b> | <b>SRR</b> |
|-----------------|------------------|------------|
| GCWGS-0001      | SAMN04962259     | SRR5198687 |
| GCWGS-0004      | SAMN04962262     | SRR5198684 |
| GCWGS-0005      | SAMN04962263     | SRR5198683 |
| GCWGS-0031      | SAMN04978173     | SRR4048883 |
| GCWGS-0044      | SAMN04978186     | SRR4048838 |
| GCWGS-0047      | SAMN04978189     | SRR4048842 |
| GCWGS-0048      | SAMN04978190     | SRR4048843 |
| GCWGS-0054      | SAMN04958432     | SRR5198662 |
| GCWGS-0067      | SAMN04958445     | SRR5198649 |
| GCWGS-0085      | SAMN05158828     | SRR5198631 |
| GCWGS-0097      | SAMN05158840     | SRR5198619 |
| GCWGS-0101      | SAMN05164102     | SRR5198615 |
| GCWGS-0118      | SAMN05164119     | SRR5198598 |
| GCWGS-0129      | SAMN05209089     | SRR5198587 |
| GCWGS-0130      | SAMN05209090     | SRR5198586 |
| GCWGS-0136      | SAMN05209096     | SRR5198580 |
| GCWGS-0145      | SAMN05209105     | SRR5198571 |
| GCWGS-0148      | SAMN05209108     | SRR5198568 |
| GCWGS-0152      | SAMN05217710     | SRR4048852 |
| GCWGS-0155      | SAMN05217713     | SRR4048855 |
| GCWGS-0160      | SAMN05554157     | SRR4048860 |
| GCWGS-0177      | SAMN05554172     | SRR4048877 |
| GCWGS-0193      | SAMN05629335     | SRR8088120 |
| GCWGS-0207      | SAMN05413567     | SRR5198556 |
| GCWGS-0228      | SAMN05453163     | SRR5235435 |
| GCWGS-0235      | SAMN05453170     | SRR5235428 |
| GCWGS-0245      | SAMN05630998     | SRR8088125 |
| GCWGS-0248      | SAMN05631001     | SRR8088118 |
| GCWGS-0260      | SAMN05711328     | SRR5235410 |
| GCWGS-0261      | SAMN05711329     | SRR5235409 |
| GCWGS-0268      | SAMN05711336     | SRR5235402 |
| GCWGS-0269      | SAMN05711337     | SRR5235401 |
| GCWGS-0279      | SAMN05831566     | SRR8088174 |
| GCWGS-0285      | SAMN05859759     | SRR5235390 |
| GCWGS-0308      | SAMN05859805     | SRR5235368 |
| GCWGS-0314      | SAMN05963582     | SRR8088176 |
| GCWGS-0317      | SAMN05963585     | SRR8088160 |
| GCWGS-0327      | SAMN05913856     | SRR5235360 |
| GCWGS-0333      | SAMN05913862     | SRR5235354 |
| GCWGS-0345      | SAMN05924835     | SRR5198537 |
| GCWGS-0349      | SAMN05924839     | SRR5198533 |
| GCWGS-0352      | SAMN05924842     | SRR5198530 |
| GCWGS-0356      | SAMN05935700     | SRR5235348 |
| GCWGS-0383      | SAMN05991004     | SRR5235321 |

|            |              |            |
|------------|--------------|------------|
| GCWGS-0400 | SAMN05981977 | SRR5198511 |
| GCWGS-0410 | SAMN05981987 | SRR5198501 |
| GCWGS-0439 | SAMN06043873 | SRR5198493 |
| GCWGS-0440 | SAMN06043874 | SRR5198492 |
| GCWGS-0443 | SAMN06043877 | SRR5198489 |
| GCWGS-0446 | SAMN06043880 | SRR5198486 |
| GCWGS-0456 | SAMN06077083 | SRR5235290 |
| GCWGS-0461 | SAMN06105409 | SRR8088166 |
| GCWGS-0489 | SAMN06101587 | SRR5235271 |
| GCWGS-0497 | SAMN06124544 | SRR5235263 |
| GCWGS-0500 | SAMN06124547 | SRR5235260 |
| GCWGS-0503 | SAMN06124550 | SRR5235257 |
| GCWGS-0513 | SAMN06124560 | SRR5235247 |
| GCWGS-0517 | SAMN06124564 | SRR5235243 |
| GCWGS-0518 | SAMN06131830 | SRR5235242 |
| GCWGS-0530 | SAMN06131842 | SRR5235230 |
| GCWGS-0533 | SAMN06131845 | SRR5235227 |
| GCWGS-0537 | SAMN06131849 | SRR5235223 |
| GCWGS-0541 | SAMN06186749 | SRR5198485 |
| GCWGS-0549 | SAMN06141642 | SRR5235212 |
| GCWGS-0561 | SAMN06141654 | SRR5235200 |
| GCWGS-0567 | SAMN06141659 | SRR5235194 |
| GCWGS-0575 | SAMN06163697 | SRR5235186 |
| GCWGS-0585 | SAMN06163707 | SRR5235176 |
| GCWGS-0592 | SAMN06163714 | SRR5235169 |
| GCWGS-0594 | SAMN06231175 | SRR8088184 |
| GCWGS-0597 | SAMN06231178 | SRR8088181 |
| GCWGS-0606 | SAMN06250303 | SRR8088113 |
| GCWGS-0611 | SAMN06250308 | SRR8088110 |
| GCWGS-0621 | SAMN06250318 | SRR8088101 |
| GCWGS-0633 | SAMN06272718 | SRR8088138 |
| GCWGS-0642 | SAMN06350603 | SRR5990428 |
| GCWGS-0650 | SAMN06350611 | SRR5990485 |
| GCWGS-0654 | SAMN06350614 | SRR5990482 |
| GCWGS-0656 | SAMN06350616 | SRR5990456 |
| GCWGS-0694 | SAMN06847084 | SRR5990450 |
| GCWGS-0700 | SAMN06847090 | SRR5990467 |
| GCWGS-0710 | SAMN06847099 | SRR5990448 |
| GCWGS-0724 | SAMN06847113 | SRR5990462 |
| GCWGS-0733 | SAMN06847122 | SRR5990437 |
| GCWGS-0736 | SAMN06847125 | SRR5990438 |
| GCWGS-0751 | SAMN07271501 | SRR5990390 |
| GCWGS-0752 | SAMN07271502 | SRR5990389 |
| GCWGS-0753 | SAMN07271503 | SRR5990388 |
| GCWGS-0754 | SAMN07271504 | SRR5990387 |
| GCWGS-0755 | SAMN07271505 | SRR5990386 |
| GCWGS-0756 | SAMN07271506 | SRR5990385 |

|            |              |            |
|------------|--------------|------------|
| GCWGS-0757 | SAMN07271507 | SRR5990384 |
| GCWGS-0758 | SAMN07271508 | SRR5990383 |
| GCWGS-0759 | SAMN07271509 | SRR5990382 |
| GCWGS-0760 | SAMN07271510 | SRR5990381 |
| GCWGS-0761 | SAMN07271511 | SRR5990349 |
| GCWGS-0762 | SAMN07271512 | SRR5990348 |
| GCWGS-0763 | SAMN07271513 | SRR5990351 |
| GCWGS-0764 | SAMN07271514 | SRR5990350 |
| GCWGS-0765 | SAMN07271515 | SRR5990345 |
| GCWGS-0766 | SAMN07271516 | SRR5990344 |
| GCWGS-0767 | SAMN07287156 | SRR5990347 |
| GCWGS-0768 | SAMN07287157 | SRR5990346 |
| GCWGS-0769 | SAMN07287158 | SRR5990357 |
| GCWGS-0770 | SAMN07287159 | SRR5990356 |
| GCWGS-0771 | SAMN07287160 | SRR5990372 |
| GCWGS-0772 | SAMN07287161 | SRR5990373 |
| GCWGS-0773 | SAMN07287162 | SRR5990374 |
| GCWGS-0774 | SAMN07287163 | SRR5990375 |
| GCWGS-0775 | SAMN07287164 | SRR5990376 |
| GCWGS-0776 | SAMN07287165 | SRR5990377 |
| GCWGS-0777 | SAMN07287166 | SRR5990378 |
| GCWGS-0778 | SAMN07287167 | SRR5990379 |
| GCWGS-0779 | SAMN07287168 | SRR5990369 |
| GCWGS-0780 | SAMN07287169 | SRR5990370 |
| GCWGS-0781 | SAMN07287170 | SRR5990359 |
| GCWGS-0782 | SAMN07287171 | SRR5990358 |
| GCWGS-0783 | SAMN07299097 | SRR5990380 |
| GCWGS-0784 | SAMN07299098 | SRR5990371 |
| GCWGS-0785 | SAMN07299099 | SRR5990355 |
| GCWGS-0786 | SAMN07299100 | SRR5990354 |
| GCWGS-0787 | SAMN07299101 | SRR5990353 |
| GCWGS-0788 | SAMN07299102 | SRR5990352 |
| GCWGS-0789 | SAMN07299103 | SRR5990361 |
| GCWGS-0790 | SAMN07299104 | SRR5990360 |
| GCWGS-0791 | SAMN07357575 | SRR8088094 |
| GCWGS-0792 | SAMN07299105 | SRR5990364 |
| GCWGS-0793 | SAMN07299106 | SRR5990365 |
| GCWGS-0794 | SAMN07299107 | SRR5990362 |
| GCWGS-0795 | SAMN07299108 | SRR5990363 |
| GCWGS-0796 | SAMN07299109 | SRR5990367 |
| GCWGS-0797 | SAMN07299110 | SRR5990368 |
| GCWGS-0798 | SAMN07299111 | SRR5990366 |
| GCWGS-0799 | SAMN07342070 | SRR8071022 |
| GCWGS-0800 | SAMN07342053 | SRR8071409 |
| GCWGS-0801 | SAMN07342054 | SRR8071408 |
| GCWGS-0802 | SAMN07342055 | SRR8071407 |
| GCWGS-0803 | SAMN07342056 | SRR8071406 |

|            |              |            |
|------------|--------------|------------|
| GCWGS-0804 | SAMN07342057 | SRR8071405 |
| GCWGS-0805 | SAMN07342058 | SRR8071404 |
| GCWGS-0806 | SAMN07342059 | SRR8071403 |
| GCWGS-0807 | SAMN07342060 | SRR8071402 |
| GCWGS-0808 | SAMN07342061 | SRR8071401 |
| GCWGS-0809 | SAMN07342062 | SRR8071025 |
| GCWGS-0810 | SAMN07342063 | SRR8071024 |
| GCWGS-0811 | SAMN07342064 | SRR8071027 |
| GCWGS-0812 | SAMN07342065 | SRR8071026 |
| GCWGS-0813 | SAMN07342066 | SRR8071021 |
| GCWGS-0814 | SAMN07342067 | SRR8071020 |
| GCWGS-0815 | SAMN07342068 | SRR8071023 |
| GCWGS-0816 | SAMN07357576 | SRR8071029 |
| GCWGS-0817 | SAMN07357577 | SRR8071028 |
| GCWGS-0818 | SAMN07357578 | SRR8071333 |
| GCWGS-0819 | SAMN07357579 | SRR8071334 |
| GCWGS-0820 | SAMN07357580 | SRR8071335 |
| GCWGS-0821 | SAMN07357581 | SRR8071336 |
| GCWGS-0822 | SAMN07357582 | SRR7401670 |
| GCWGS-0823 | SAMN07357583 | SRR8071337 |
| GCWGS-0824 | SAMN07357584 | SRR7401668 |
| GCWGS-0825 | SAMN07357585 | SRR8071338 |
| GCWGS-0826 | SAMN07357586 | SRR8071339 |
| GCWGS-0827 | SAMN07357587 | SRR8071340 |
| GCWGS-0828 | SAMN07357588 | SRR8071331 |
| GCWGS-0829 | SAMN07357589 | SRR8071332 |
| GCWGS-0830 | SAMN07357590 | SRR8071216 |
| GCWGS-0831 | SAMN07427737 | SRR8071215 |
| GCWGS-0832 | SAMN07427738 | SRR8071214 |
| GCWGS-0833 | SAMN07427739 | SRR8071213 |
| GCWGS-0834 | SAMN07427740 | SRR8071212 |
| GCWGS-0835 | SAMN07427741 | SRR8071211 |
| GCWGS-0836 | SAMN07427742 | SRR8071210 |
| GCWGS-0837 | SAMN07427743 | SRR8071209 |
| GCWGS-0840 | SAMN07427746 | SRR8071208 |
| GCWGS-0841 | SAMN07427747 | SRR8071207 |
| GCWGS-0842 | SAMN07427748 | SRR8071198 |
| GCWGS-0843 | SAMN07427749 | SRR8071199 |
| GCWGS-0844 | SAMN07427750 | SRR8071196 |
| GCWGS-0853 | SAMN07427751 | SRR8071197 |
| GCWGS-0854 | SAMN07427752 | SRR8071202 |
| GCWGS-0855 | SAMN07427753 | SRR8071203 |
| GCWGS-0856 | SAMN07427754 | SRR8071117 |
| GCWGS-0858 | SAMN07427756 | SRR8071201 |
| GCWGS-0859 | SAMN07427757 | SRR8071193 |
| GCWGS-0860 | SAMN07427758 | SRR8071194 |
| GCWGS-0861 | SAMN07427759 | SRR8071080 |

|            |              |            |
|------------|--------------|------------|
| GCWGS-0862 | SAMN07427760 | SRR8071079 |
| GCWGS-0863 | SAMN07427761 | SRR8071082 |
| GCWGS-0864 | SAMN07427762 | SRR8071081 |
| GCWGS-0865 | SAMN07427763 | SRR8071084 |
| GCWGS-0866 | SAMN07427764 | SRR8071083 |
| GCWGS-0867 | SAMN07427765 | SRR8071086 |
| GCWGS-0868 | SAMN07427766 | SRR8071085 |
| GCWGS-0869 | SAMN07427767 | SRR8071078 |
| GCWGS-0870 | SAMN07428652 | SRR8071077 |
| GCWGS-0871 | SAMN07428653 | SRR8071417 |
| GCWGS-0872 | SAMN07428654 | SRR8071418 |
| GCWGS-0873 | SAMN07428655 | SRR8071419 |
| GCWGS-0874 | SAMN07428656 | SRR8071420 |
| GCWGS-0879 | SAMN07428661 | SRR7401674 |
| GCWGS-0880 | SAMN07428662 | SRR8071416 |
| GCWGS-0881 | SAMN07428663 | SRR8071411 |
| GCWGS-0882 | SAMN07428664 | SRR8071412 |
| GCWGS-0883 | SAMN07428665 | SRR8071264 |
| GCWGS-0884 | SAMN07428666 | SRR8071087 |
| GCWGS-0885 | SAMN07428667 | SRR8071262 |
| GCWGS-0886 | SAMN07428668 | SRR8071261 |
| GCWGS-0887 | SAMN07428669 | SRR8071268 |
| GCWGS-0888 | SAMN07428670 | SRR8071267 |
| GCWGS-0889 | SAMN07428671 | SRR8071266 |
| GCWGS-0890 | SAMN07428672 | SRR8071265 |
| GCWGS-0891 | SAMN07428673 | SRR8071270 |
| GCWGS-0892 | SAMN07428674 | SRR7401675 |
| GCWGS-0893 | SAMN07428675 | SRR8071269 |
| GCWGS-0894 | SAMN07428676 | SRR8071279 |
| GCWGS-0895 | SAMN07428677 | SRR8071280 |
| GCWGS-0896 | SAMN07428678 | SRR8071277 |
| GCWGS-0897 | SAMN07428679 | SRR8071278 |
| GCWGS-0898 | SAMN07428680 | SRR8071275 |
| GCWGS-0899 | SAMN07428681 | SRR8071276 |
| GCWGS-0900 | SAMN07428682 | SRR8071273 |
| GCWGS-0901 | SAMN07428683 | SRR8071274 |
| GCWGS-0902 | SAMN07456579 | SRR8071271 |
| GCWGS-0903 | SAMN07456580 | SRR8071272 |
| GCWGS-0904 | SAMN07456581 | SRR8071140 |
| GCWGS-0905 | SAMN07503573 | SRR8071141 |
| GCWGS-0906 | SAMN07503574 | SRR8071136 |
| GCWGS-0907 | SAMN07503575 | SRR8071135 |
| GCWGS-0908 | SAMN07503576 | SRR8071138 |
| GCWGS-0909 | SAMN07503577 | SRR8071137 |
| GCWGS-0910 | SAMN07503578 | SRR8071134 |
| GCWGS-0911 | SAMN07503579 | SRR8071133 |
| GCWGS-0912 | SAMN07503580 | SRR8071373 |

|            |              |            |
|------------|--------------|------------|
| GCWGS-0913 | SAMN07503581 | SRR8071374 |
| GCWGS-0914 | SAMN07503582 | SRR8071375 |
| GCWGS-0915 | SAMN07503583 | SRR8071376 |
| GCWGS-0916 | SAMN07503584 | SRR8071369 |
| GCWGS-0917 | SAMN07503585 | SRR8071370 |
| GCWGS-0918 | SAMN07503586 | SRR8071371 |
| GCWGS-0919 | SAMN07503587 | SRR8071372 |
| GCWGS-0920 | SAMN07503588 | SRR8071377 |
| GCWGS-0921 | SAMN07503589 | SRR8071378 |
| GCWGS-0922 | SAMN07503590 | SRR8071043 |
| GCWGS-0923 | SAMN07503591 | SRR8071042 |
| GCWGS-0924 | SAMN07503592 | SRR8071041 |
| GCWGS-0925 | SAMN07503593 | SRR8071040 |
| GCWGS-0926 | SAMN07503594 | SRR8071047 |
| GCWGS-0927 | SAMN07503595 | SRR8071046 |
| GCWGS-0928 | SAMN07503596 | SRR8071045 |
| GCWGS-0930 | SAMN07503598 | SRR8071044 |
| GCWGS-0931 | SAMN07503599 | SRR8071049 |
| GCWGS-0932 | SAMN07503600 | SRR8071048 |
| GCWGS-0933 | SAMN07503601 | SRR8071178 |
| GCWGS-0934 | SAMN07503602 | SRR8071189 |
| GCWGS-0935 | SAMN07503603 | SRR8071155 |
| GCWGS-0936 | SAMN07503604 | SRR8071156 |
| GCWGS-0937 | SAMN07461300 | SRR8071139 |
| GCWGS-0938 | SAMN07461301 | SRR8071142 |
| GCWGS-0939 | SAMN07503717 | SRR8071153 |
| GCWGS-0940 | SAMN07503718 | SRR8071154 |
| GCWGS-0941 | SAMN07503719 | SRR8071151 |
| GCWGS-0942 | SAMN07503720 | SRR8071152 |
| GCWGS-0943 | SAMN07503721 | SRR8071149 |
| GCWGS-0944 | SAMN07503722 | SRR8071150 |
| GCWGS-0945 | SAMN07503723 | SRR8071290 |
| GCWGS-0946 | SAMN07503724 | SRR8071289 |
| GCWGS-0947 | SAMN07503725 | SRR8071292 |
| GCWGS-0948 | SAMN07503726 | SRR8071291 |
| GCWGS-0954 | SAMN07503732 | SRR8071281 |
| GCWGS-0969 | SAMN07665689 | SRR8071428 |
| GCWGS-0970 | SAMN07665690 | SRR8071429 |
| GCWGS-0971 | SAMN07665691 | SRR8071430 |
| GCWGS-0972 | SAMN07665692 | SRR8071431 |
| GCWGS-0973 | SAMN07665693 | SRR8070993 |
| GCWGS-0974 | SAMN07665694 | SRR8071421 |
| GCWGS-0975 | SAMN07665695 | SRR8071422 |
| GCWGS-0976 | SAMN07665696 | SRR8071097 |
| GCWGS-0977 | SAMN07665697 | SRR8071096 |
| GCWGS-0978 | SAMN07665698 | SRR8071095 |
| GCWGS-0979 | SAMN07665699 | SRR8071094 |

|            |              |            |
|------------|--------------|------------|
| GCWGS-0980 | SAMN07665700 | SRR8071093 |
| GCWGS-0981 | SAMN07665701 | SRR8071092 |
| GCWGS-0982 | SAMN07665702 | SRR8071091 |
| GCWGS-0983 | SAMN07665703 | SRR8071090 |
| GCWGS-0984 | SAMN07665704 | SRR8071105 |
| GCWGS-0985 | SAMN07665705 | SRR8071104 |
| GCWGS-0986 | SAMN07665706 | SRR8071219 |
| GCWGS-0987 | SAMN07665707 | SRR8071220 |
| GCWGS-0988 | SAMN07665708 | SRR8071217 |
| GCWGS-0989 | SAMN07665709 | SRR8071218 |
| GCWGS-0990 | SAMN07665710 | SRR8071223 |
| GCWGS-0991 | SAMN07665711 | SRR8071224 |
| GCWGS-0993 | SAMN07665713 | SRR8071221 |
| GCWGS-0994 | SAMN07665714 | SRR8071222 |
| GCWGS-0995 | SAMN08326892 | SRR8071358 |
| GCWGS-0996 | SAMN08326893 | SRR8071359 |
| GCWGS-0997 | SAMN08326894 | SRR8071122 |
| GCWGS-0998 | SAMN08326895 | SRR8071259 |
| GCWGS-0999 | SAMN08326896 | SRR8071322 |
| GCWGS-1000 | SAMN08326897 | SRR8071321 |
| GCWGS-1002 | SAMN08326899 | SRR8071323 |
| GCWGS-1003 | SAMN08326900 | SRR8071326 |
| GCWGS-1004 | SAMN07682878 | SRR8071159 |
| GCWGS-1005 | SAMN07682879 | SRR8071160 |
| GCWGS-1006 | SAMN07682880 | SRR8071161 |
| GCWGS-1007 | SAMN07682881 | SRR8071162 |
| GCWGS-1008 | SAMN07682882 | SRR8071163 |
| GCWGS-1010 | SAMN07682884 | SRR8071165 |
| GCWGS-1011 | SAMN07682885 | SRR8071166 |
| GCWGS-1012 | SAMN07682886 | SRR8071167 |
| GCWGS-1013 | SAMN07757303 | SRR8071226 |
| GCWGS-1014 | SAMN07757302 | SRR8071225 |
| GCWGS-1019 | SAMN07837911 | SRR8071342 |
| GCWGS-1020 | SAMN07837912 | SRR8071341 |
| GCWGS-1021 | SAMN07837913 | SRR8071344 |
| GCWGS-1022 | SAMN08007176 | SRR8071263 |
| GCWGS-1023 | SAMN08007177 | SRR8071241 |
| GCWGS-1024 | SAMN08007178 | SRR8071242 |
| GCWGS-1025 | SAMN08007179 | SRR8071235 |
| GCWGS-1026 | SAMN08007180 | SRR8071236 |
| GCWGS-1027 | SAMN08007181 | SRR8071237 |
| GCWGS-1028 | SAMN08007182 | SRR8071238 |
| GCWGS-1029 | SAMN08007183 | SRR8071257 |
| GCWGS-1030 | SAMN08007184 | SRR8071258 |
| GCWGS-1031 | SAMN08007185 | SRR8071363 |
| GCWGS-1032 | SAMN08007186 | SRR8071362 |
| GCWGS-1033 | SAMN08007187 | SRR8071361 |

|            |              |            |
|------------|--------------|------------|
| GCWGS-1034 | SAMN08007188 | SRR8071360 |
| GCWGS-1035 | SAMN08007189 | SRR8071367 |
| GCWGS-1038 | SAMN07958573 | SRR8071347 |
| GCWGS-1039 | SAMN07958574 | SRR8071350 |
| GCWGS-1041 | SAMN07958576 | SRR8071260 |
| GCWGS-1042 | SAMN07947838 | SRR8071343 |
| GCWGS-1043 | SAMN07947839 | SRR8071346 |
| GCWGS-1044 | SAMN07947840 | SRR8071345 |
| GCWGS-1045 | SAMN07947841 | SRR8071348 |
| GCWGS-1046 | SAMN08007192 | SRR8071364 |
| GCWGS-1047 | SAMN08007193 | SRR8071355 |
| GCWGS-1048 | SAMN08007194 | SRR8071354 |
| GCWGS-1049 | SAMN08007195 | SRR8071070 |
| GCWGS-1056 | SAMN08025339 | SRR8071069 |
| GCWGS-1057 | SAMN08025340 | SRR8071068 |
| GCWGS-1058 | SAMN08025341 | SRR8071067 |
| GCWGS-1059 | SAMN08025342 | SRR8071066 |
| GCWGS-1060 | SAMN08025343 | SRR8071065 |
| GCWGS-1061 | SAMN08025344 | SRR8071064 |
| GCWGS-1062 | SAMN08025345 | SRR8071063 |
| GCWGS-1074 | SAMN08331913 | SRR8071325 |
| GCWGS-1075 | SAMN08331914 | SRR8071328 |
| GCWGS-1076 | SAMN08331915 | SRR8071327 |
| GCWGS-1077 | SAMN08331916 | SRR8071320 |
| GCWGS-1078 | SAMN08331917 | SRR8071319 |
| GCWGS-1079 | SAMN08331918 | SRR8071183 |
| GCWGS-1080 | SAMN08331919 | SRR8071184 |
| GCWGS-1081 | SAMN08331920 | SRR8071181 |
| GCWGS-1082 | SAMN08331921 | SRR8071182 |
| GCWGS-1083 | SAMN08331922 | SRR8071187 |
| GCWGS-1084 | SAMN08331923 | SRR8071188 |
| GCWGS-1085 | SAMN08331924 | SRR8071185 |
| GCWGS-1086 | SAMN08331925 | SRR8071186 |
| GCWGS-1087 | SAMN08331926 | SRR8071179 |
| GCWGS-1088 | SAMN08331927 | SRR8071180 |
| GCWGS-1089 | SAMN08331928 | SRR8071005 |
| GCWGS-1090 | SAMN08331929 | SRR8071004 |
| GCWGS-1091 | SAMN08331930 | SRR8071108 |
| GCWGS-1092 | SAMN08331931 | SRR8071106 |
| GCWGS-1093 | SAMN08331932 | SRR8071009 |
| GCWGS-1094 | SAMN08331933 | SRR8071008 |
| GCWGS-1095 | SAMN08331934 | SRR8071007 |
| GCWGS-1096 | SAMN08331935 | SRR8071006 |
| GCWGS-1097 | SAMN08331936 | SRR8071089 |
| GCWGS-1098 | SAMN08331937 | SRR8071088 |
| GCWGS-1099 | SAMN08331938 | SRR8071305 |
| GCWGS-1100 | SAMN08331939 | SRR8071306 |



|            |              |            |
|------------|--------------|------------|
| GCWGS-1101 | SAMN08331940 | SRR8071307 |
| GCWGS-1102 | SAMN08331941 | SRR8071308 |
| GCWGS-1108 | SAMN08331947 | SRR8071244 |
| GCWGS-1109 | SAMN08331948 | SRR8071232 |
| GCWGS-1110 | SAMN08331949 | SRR8071231 |
| GCWGS-1111 | SAMN08331950 | SRR8071234 |
| GCWGS-1112 | SAMN08331951 | SRR8071233 |
| GCWGS-1113 | SAMN08331952 | SRR8071228 |
| GCWGS-1114 | SAMN08331953 | SRR8071227 |
| GCWGS-1115 | SAMN08331954 | SRR8071230 |
| GCWGS-1116 | SAMN08331955 | SRR8071229 |
| GCWGS-1117 | SAMN08331956 | SRR8071240 |
| GCWGS-1118 | SAMN08331957 | SRR8071239 |
| GCWGS-1119 | SAMN08331958 | SRR8071115 |
| GCWGS-1120 | SAMN08331959 | SRR8071116 |
| GCWGS-1121 | SAMN08331960 | SRR8071113 |
| GCWGS-1122 | SAMN08331961 | SRR8071114 |
| GCWGS-1123 | SAMN08331962 | SRR8071111 |
| GCWGS-1124 | SAMN08331963 | SRR8071112 |
| GCWGS-1125 | SAMN08331964 | SRR8071109 |
| GCWGS-1126 | SAMN08331965 | SRR8071110 |
| GCWGS-1127 | SAMN08331966 | SRR8071118 |
| GCWGS-1128 | SAMN08331967 | SRR8071119 |
| GCWGS-1129 | SAMN08331968 | SRR8071330 |
| GCWGS-1130 | SAMN08331969 | SRR8071329 |
| GCWGS-1131 | SAMN08331970 | SRR8071148 |
| GCWGS-1132 | SAMN08331971 | SRR8071147 |
| GCWGS-1133 | SAMN08331972 | SRR8071146 |
| GCWGS-1134 | SAMN08331973 | SRR8071145 |
| GCWGS-1135 | SAMN08331974 | SRR8071144 |
| GCWGS-1136 | SAMN08331975 | SRR8071143 |
| GCWGS-1137 | SAMN08331976 | SRR8071158 |
| GCWGS-1138 | SAMN08331977 | SRR8071157 |
| GCWGS-1139 | SAMN08331978 | SRR8071032 |
| GCWGS-1140 | SAMN08331979 | SRR8071033 |
| GCWGS-1141 | SAMN08331980 | SRR8071034 |
| GCWGS-1142 | SAMN08331981 | SRR8071035 |
| GCWGS-1143 | SAMN08331982 | SRR8071036 |
| GCWGS-1144 | SAMN08331983 | SRR8071037 |
| GCWGS-1145 | SAMN08331984 | SRR8071038 |
| GCWGS-1146 | SAMN08331985 | SRR8071039 |
| GCWGS-1147 | SAMN08331986 | SRR8071030 |
| GCWGS-1148 | SAMN08331987 | SRR8071031 |
| GCWGS-1149 | SAMN08331988 | SRR8071174 |
| GCWGS-1150 | SAMN08331989 | SRR8071175 |
| GCWGS-1151 | SAMN08331990 | SRR8071172 |
| GCWGS-1152 | SAMN08331991 | SRR8071173 |

|            |              |            |
|------------|--------------|------------|
| GCWGS-1153 | SAMN08331992 | SRR8071170 |
| GCWGS-1154 | SAMN08331993 | SRR8071171 |
| GCWGS-1250 | SAMN08326872 | SRR8071062 |
| GCWGS-1251 | SAMN08326873 | SRR7401672 |
| GCWGS-1252 | SAMN08326874 | SRR8071061 |
| GCWGS-1253 | SAMN08326875 | SRR8071352 |
| GCWGS-1254 | SAMN08326876 | SRR8071353 |
| GCWGS-1255 | SAMN08326877 | SRR8071120 |
| GCWGS-1256 | SAMN08326878 | SRR8071121 |
| GCWGS-1257 | SAMN08326879 | SRR8071356 |
| GCWGS-1258 | SAMN08326880 | SRR8071357 |
| GCWGS-1290 | SAMN08472504 | SRR8071168 |
| GCWGS-1291 | SAMN08472505 | SRR8071169 |
| GCWGS-1292 | SAMN08472506 | SRR8071176 |
| GCWGS-1293 | SAMN08472507 | SRR8071177 |
| GCWGS-1294 | SAMN08472508 | SRR8071298 |
| GCWGS-1295 | SAMN08472509 | SRR8071243 |
| GCWGS-1296 | SAMN08472510 | SRR8071300 |
| GCWGS-1297 | SAMN08472511 | SRR8071299 |
| GCWGS-1298 | SAMN08472512 | SRR8071294 |
| GCWGS-1299 | SAMN08472513 | SRR8071293 |
| GCWGS-1300 | SAMN08472514 | SRR8071296 |
| GCWGS-1301 | SAMN08472515 | SRR8071295 |
| GCWGS-1302 | SAMN08472516 | SRR8071246 |
| GCWGS-1303 | SAMN08472517 | SRR8307325 |
| GCWGS-1304 | SAMN08472518 | SRR8071245 |
| GCWGS-1305 | SAMN08472519 | SRR8071385 |
| GCWGS-1306 | SAMN08472520 | SRR8071386 |
| GCWGS-1307 | SAMN08472521 | SRR8071387 |
| GCWGS-1308 | SAMN08472522 | SRR8071388 |
| GCWGS-1309 | SAMN08472523 | SRR8071381 |
| GCWGS-1310 | SAMN08472524 | SRR8071382 |
| GCWGS-1311 | SAMN08472525 | SRR8071383 |
| GCWGS-1316 | SAMN08472530 | SRR8071054 |
| GCWGS-1317 | SAMN08472531 | SRR8071053 |
| GCWGS-1318 | SAMN08472532 | SRR8071052 |
| GCWGS-1319 | SAMN08472533 | SRR8071059 |
| GCWGS-1320 | SAMN08472534 | SRR8071058 |
| GCWGS-1321 | SAMN08472535 | SRR8071057 |
| GCWGS-1322 | SAMN08472536 | SRR8071056 |
| GCWGS-1323 | SAMN08472537 | SRR8071051 |
| GCWGS-1324 | SAMN08472538 | SRR8071050 |
| GCWGS-1325 | SAMN08472539 | SRR8071251 |
| GCWGS-1326 | SAMN08472540 | SRR8071252 |
| GCWGS-1327 | SAMN08472541 | SRR8071249 |
| GCWGS-1328 | SAMN08472542 | SRR8071250 |
| GCWGS-1329 | SAMN08472543 | SRR8071255 |

|            |              |            |
|------------|--------------|------------|
| GCWGS-1330 | SAMN08472544 | SRR8071256 |
| GCWGS-1331 | SAMN08472545 | SRR8071253 |
| GCWGS-1332 | SAMN08472546 | SRR8071254 |
| GCWGS-1333 | SAMN08472547 | SRR8071247 |
| GCWGS-1334 | SAMN08472548 | SRR8071248 |
| GCWGS-1335 | SAMN08472549 | SRR8071394 |
| GCWGS-1336 | SAMN08472550 | SRR8071393 |
| GCWGS-1337 | SAMN08472551 | SRR8071396 |
| GCWGS-1338 | SAMN08472552 | SRR8071395 |
| GCWGS-1339 | SAMN08472553 | SRR8071398 |
| GCWGS-1340 | SAMN08472554 | SRR8071397 |
| GCWGS-1341 | SAMN08472555 | SRR8071400 |
| GCWGS-1342 | SAMN08472556 | SRR8071399 |
| GCWGS-1346 | SAMN08472560 | SRR8070995 |
| GCWGS-1348 | SAMN08472562 | SRR8070997 |
| GCWGS-1352 | SAMN08472566 | SRR8071001 |
| GCWGS-1353 | SAMN08472567 | SRR8071002 |
| GCWGS-1354 | SAMN08472568 | SRR8071003 |
| GCWGS-1355 | SAMN08472569 | SRR8071132 |
| GCWGS-1356 | SAMN08472570 | SRR7401676 |
| GCWGS-1357 | SAMN08472571 | SRR7401671 |
| GCWGS-1358 | SAMN08472572 | SRR8071131 |
| GCWGS-1359 | SAMN08472573 | SRR8071130 |
| GCWGS-1360 | SAMN08472574 | SRR8071129 |
| GCWGS-1361 | SAMN08472575 | SRR8071128 |
| GCWGS-1362 | SAMN08472576 | SRR8071127 |
| GCWGS-1363 | SAMN08472577 | SRR8071126 |
| GCWGS-1364 | SAMN08472578 | SRR8071125 |
| GCWGS-1365 | SAMN08472579 | SRR8071124 |
| GCWGS-1366 | SAMN08472580 | SRR8071123 |
| GCWGS-1367 | SAMN08472581 | SRR7401679 |
| GCWGS-1368 | SAMN08472582 | SRR8071317 |
| GCWGS-1369 | SAMN08472583 | SRR8071318 |
| GCWGS-1370 | SAMN08472584 | SRR8071315 |
| GCWGS-1574 | SAMN08522602 | SRR8071316 |
| GCWGS-1575 | SAMN08522603 | SRR8071313 |
| GCWGS-1576 | SAMN08522604 | SRR8071314 |
| GCWGS-1577 | SAMN08522605 | SRR8071311 |
| GCWGS-1579 | SAMN08522607 | SRR8071309 |
| GCWGS-1580 | SAMN08522608 | SRR8071310 |
| GCWGS-1581 | SAMN08522609 | SRR8071017 |
| GCWGS-1582 | SAMN08522610 | SRR8071016 |
| GCWGS-1583 | SAMN08522611 | SRR8071019 |
| GCWGS-1584 | SAMN08522612 | SRR8071018 |
| GCWGS-1585 | SAMN08522613 | SRR8071013 |
| GCWGS-1586 | SAMN08522614 | SRR8071012 |
| GCWGS-1587 | SAMN08522615 | SRR8071015 |

|             |              |            |
|-------------|--------------|------------|
| GCWGS-1588  | SAMN08522616 | SRR8071014 |
| GCWGS-1589  | SAMN08522617 | SRR8071011 |
| GCWGS-1590  | SAMN08522618 | SRR8071010 |
| GCWGS-1591  | SAMN08522619 | SRR8071099 |
| GCWGS-1592  | SAMN08522620 | SRR8071098 |
| GCWGS-1593  | SAMN08522621 | SRR8071101 |
| GCWGS-1594  | SAMN08522622 | SRR8071100 |
| GCWGS-1595  | SAMN08522623 | SRR8071103 |
| GCWGS-1596  | SAMN08522624 | SRR8071102 |
| GCWGS-1597  | SAMN08522625 | SRR8071390 |
| GCWGS-1598  | SAMN08522626 | SRR7401678 |
| GCWGS-1599  | SAMN08522627 | SRR7401681 |
| GCWGS-1600  | SAMN08522628 | SRR7401680 |
| GCWGS-1601  | SAMN08522629 | SRR8071389 |
| GCWGS-1602  | SAMN08522630 | SRR8071368 |
| GCWGS-1603  | SAMN08522631 | SRR8071351 |
| GCWGS-1604  | SAMN08522632 | SRR8071071 |
| GCWGS-1605  | SAMN08522633 | SRR8071072 |
| GCWGS-1606  | SAMN08522634 | SRR8071060 |
| GCWGS-1607  | SAMN08522635 | SRR8071107 |
| GCWGS-1608  | SAMN08522636 | SRR8071075 |
| GCWGS-1609  | SAMN08522637 | SRR8071076 |
| GCWGS-1610  | SAMN08522638 | SRR8071073 |
| GCWGS-1611  | SAMN08522639 | SRR8071074 |
| GCWGS-1612  | SAMN08522640 | SRR8071423 |
| GCWGS-1613  | SAMN08522641 | SRR8071424 |
| GCWGS-1614  | SAMN08522642 | SRR8071206 |
| GCWGS-1615  | SAMN08522643 | SRR8071205 |
| GCWGS-1616  | SAMN08522644 | SRR8071204 |
| GCWGS-1617  | SAMN08522645 | SRR8071200 |
| GCWGS-1618  | SAMN08522646 | SRR8071195 |
| GCWGS-1619  | SAMN08522647 | SRR8071192 |
| GCWGS-1620  | SAMN08522648 | SRR7401683 |
| GCWGS-1621  | SAMN08522649 | SRR7401682 |
| GCWGS-1622  | SAMN08522650 | SRR7401685 |
| GCWGS-1623  | SAMN08522651 | SRR7401684 |
| GCWGS-1624  | SAMN08522652 | SRR8071191 |
| GCWGS-1625  | SAMN08522653 | SRR8071190 |
| GCWGS-1626  | SAMN08522654 | SRR8071284 |
| GCWGS-1627  | SAMN08522655 | SRR8071283 |
| GCWGS-1719  | SAMN08687247 | SRR8307327 |
| GCWGS-1720  | SAMN08687248 | SRR8307326 |
| GCWGS-1721  | SAMN08687249 | SRR8307329 |
| GCWGS-1722  | SAMN08687250 | SRR8307328 |
| GCWGS-1723  | SAMN08687251 | SRR8307331 |
| LRRBGS_0001 | SAMN05860025 | SRR4416029 |
| LRRBGS_0002 | SAMN05860026 | SRR4416030 |

|             |              |            |
|-------------|--------------|------------|
| LRRBGS_0003 | SAMN05860027 | SRR4416041 |
| LRRBGS_0004 | SAMN05860028 | SRR4416052 |
| LRRBGS_0005 | SAMN05860029 | SRR4416060 |
| LRRBGS_0006 | SAMN05860030 | SRR4416061 |
| LRRBGS_0007 | SAMN05860031 | SRR4416062 |
| LRRBGS_0008 | SAMN05860032 | SRR4416063 |
| LRRBGS_0009 | SAMN05860033 | SRR4416064 |
| LRRBGS_0010 | SAMN05860034 | SRR4416065 |
| LRRBGS_0011 | SAMN05860035 | SRR4416031 |
| LRRBGS_0012 | SAMN05860036 | SRR4416032 |
| LRRBGS_0013 | SAMN05860037 | SRR4416033 |
| LRRBGS_0014 | SAMN05860038 | SRR4416034 |
| LRRBGS_0015 | SAMN05860039 | SRR4416035 |
| LRRBGS_0016 | SAMN05860040 | SRR4416036 |
| LRRBGS_0017 | SAMN05860041 | SRR4416037 |
| LRRBGS_0018 | SAMN05860042 | SRR4416038 |
| LRRBGS_0019 | SAMN05860043 | SRR4416039 |
| LRRBGS_0020 | SAMN05860044 | SRR4416040 |
| LRRBGS_0021 | SAMN05860045 | SRR4416042 |
| LRRBGS_0022 | SAMN05860046 | SRR4416043 |
| LRRBGS_0023 | SAMN05860047 | SRR4416044 |
| LRRBGS_0024 | SAMN05860048 | SRR4416045 |
| LRRBGS_0026 | SAMN05860050 | SRR4416047 |
| LRRBGS_0027 | SAMN05860051 | SRR4416048 |
| LRRBGS_0028 | SAMN05860052 | SRR4416049 |
| LRRBGS_0029 | SAMN05860053 | SRR4416050 |
| LRRBGS_0030 | SAMN05860054 | SRR4416051 |
| LRRBGS_0031 | SAMN05860055 | SRR4416053 |
| LRRBGS_0032 | SAMN05860056 | SRR4416054 |
| LRRBGS_0033 | SAMN05860057 | SRR4416055 |
| LRRBGS_0034 | SAMN05860058 | SRR4416056 |
| LRRBGS_0035 | SAMN05860059 | SRR4416057 |
| LRRBGS_0036 | SAMN05860060 | SRR4416058 |
| LRRBGS_0037 | SAMN05860061 | SRR4416059 |
| LRRBGS_0156 | SAMN10590652 | SRR8329893 |
| LRRBGS_0167 | SAMN10253473 | SRR8079771 |
| LRRBGS_0185 | SAMN10253585 | SRR8079884 |
| LRRBGS_0186 | SAMN10253586 | SRR8079883 |
| LRRBGS_0187 | SAMN10253587 | SRR8079886 |
| LRRBGS_0188 | SAMN10253588 | SRR8079885 |
| LRRBGS_0189 | SAMN10253589 | SRR8079888 |
| LRRBGS_0190 | SAMN10253474 | SRR8079770 |
| LRRBGS_0191 | SAMN10253590 | SRR8079887 |
| LRRBGS_0192 | SAMN10253591 | SRR8079890 |
| LRRBGS_0193 | SAMN10253592 | SRR8079889 |
| LRRBGS_0194 | SAMN10253593 | SRR8079892 |
| LRRBGS_0195 | SAMN10253475 | SRR8079773 |

|             |              |            |
|-------------|--------------|------------|
| LRRBGS_0196 | SAMN10253594 | SRR8079891 |
| LRRBGS_0197 | SAMN10253595 | SRR8079861 |
| LRRBGS_0198 | SAMN10253596 | SRR8079860 |
| LRRBGS_0199 | SAMN10253597 | SRR8079859 |
| LRRBGS_0200 | SAMN10253598 | SRR8079858 |
| LRRBGS_0201 | SAMN10253599 | SRR8079865 |
| LRRBGS_0202 | SAMN10253600 | SRR8079864 |
| LRRBGS_0203 | SAMN10253601 | SRR8079863 |
| LRRBGS_0204 | SAMN10253602 | SRR8079862 |
| LRRBGS_0205 | SAMN10253603 | SRR8079857 |
| LRRBGS_0206 | SAMN10253604 | SRR8079856 |
| LRRBGS_0207 | SAMN10253605 | SRR8079938 |
| LRRBGS_0208 | SAMN10253606 | SRR8079939 |
| LRRBGS_0209 | SAMN10253607 | SRR8079936 |
| LRRBGS_0210 | SAMN10253608 | SRR8079937 |
| LRRBGS_0211 | SAMN10253609 | SRR8079942 |
| LRRBGS_0212 | SAMN10253610 | SRR8079943 |
| LRRBGS_0213 | SAMN10253611 | SRR8079940 |
| LRRBGS_0214 | SAMN10253612 | SRR8079941 |
| LRRBGS_0215 | SAMN10253613 | SRR8079944 |
| LRRBGS_0216 | SAMN10253614 | SRR8079945 |
| LRRBGS_0217 | SAMN10253615 | SRR8079917 |
| LRRBGS_0218 | SAMN10253616 | SRR8079916 |
| LRRBGS_0219 | SAMN10253476 | SRR8079772 |
| LRRBGS_0220 | SAMN10253617 | SRR8079919 |
| LRRBGS_0221 | SAMN10253618 | SRR8079918 |
| LRRBGS_0222 | SAMN10253619 | SRR8079921 |
| LRRBGS_0223 | SAMN10253620 | SRR8079920 |
| LRRBGS_0225 | SAMN10253622 | SRR8079922 |
| LRRBGS_0226 | SAMN10253623 | SRR8079925 |
| LRRBGS_0227 | SAMN10253477 | SRR8079767 |
| LRRBGS_0228 | SAMN10253624 | SRR8079924 |
| LRRBGS_0229 | SAMN10253625 | SRR8079816 |
| LRRBGS_0230 | SAMN10253626 | SRR8079817 |
| LRRBGS_0231 | SAMN10253627 | SRR8079818 |
| LRRBGS_0232 | SAMN10253628 | SRR8079819 |
| LRRBGS_0233 | SAMN10253629 | SRR8079820 |
| LRRBGS_0234 | SAMN10253630 | SRR8079821 |
| LRRBGS_0235 | SAMN10253631 | SRR8079822 |
| LRRBGS_0236 | SAMN10253632 | SRR8079823 |
| LRRBGS_0237 | SAMN10253633 | SRR8079824 |
| LRRBGS_0238 | SAMN10253634 | SRR8079825 |
| LRRBGS_0239 | SAMN10253635 | SRR8079803 |
| LRRBGS_0240 | SAMN10253636 | SRR8079802 |
| LRRBGS_0241 | SAMN10253637 | SRR8079801 |
| LRRBGS_0242 | SAMN10253638 | SRR8079800 |
| LRRBGS_0243 | SAMN10253639 | SRR8079799 |

|             |              |            |
|-------------|--------------|------------|
| LRRBGS_0244 | SAMN10253640 | SRR8079798 |
| LRRBGS_0245 | SAMN10253641 | SRR8079797 |
| LRRBGS_0246 | SAMN10253642 | SRR8079796 |
| LRRBGS_0247 | SAMN10253643 | SRR8079805 |
| LRRBGS_0248 | SAMN10253644 | SRR8079804 |
| LRRBGS_0249 | SAMN10253478 | SRR8079766 |
| LRRBGS_0250 | SAMN10253645 | SRR8079844 |
| LRRBGS_0251 | SAMN10253646 | SRR8079845 |
| LRRBGS_0252 | SAMN10253479 | SRR8079769 |
| LRRBGS_0253 | SAMN10253647 | SRR8079842 |
| LRRBGS_0254 | SAMN10253648 | SRR8079843 |
| LRRBGS_0255 | SAMN10253649 | SRR8079840 |
| LRRBGS_0256 | SAMN10253650 | SRR8079841 |
| LRRBGS_0257 | SAMN10253651 | SRR8079838 |
| LRRBGS_0258 | SAMN10253652 | SRR8079839 |
| LRRBGS_0259 | SAMN10253653 | SRR8079836 |
| LRRBGS_0260 | SAMN10253654 | SRR8079837 |
| LRRBGS_0262 | SAMN10253656 | SRR8079832 |
| LRRBGS_0263 | SAMN10253657 | SRR8079835 |
| LRRBGS_0264 | SAMN10253658 | SRR8079834 |
| LRRBGS_0265 | SAMN10253659 | SRR8079829 |
| LRRBGS_0266 | SAMN10253660 | SRR8079828 |
| LRRBGS_0267 | SAMN10253661 | SRR8079831 |
| LRRBGS_0268 | SAMN10253662 | SRR8079830 |
| LRRBGS_0269 | SAMN10253663 | SRR8079827 |
| LRRBGS_0270 | SAMN10253664 | SRR8079826 |
| LRRBGS_0271 | SAMN10253665 | SRR8079902 |
| LRRBGS_0272 | SAMN10253666 | SRR8079903 |
| LRRBGS_0273 | SAMN10253667 | SRR8079904 |
| LRRBGS_0274 | SAMN10253668 | SRR8079905 |
| LRRBGS_0275 | SAMN10253669 | SRR8079898 |
| LRRBGS_0276 | SAMN10253670 | SRR8079899 |
| LRRBGS_0277 | SAMN10253480 | SRR8079768 |
| LRRBGS_0278 | SAMN10253671 | SRR8079900 |
| LRRBGS_0279 | SAMN10253672 | SRR8079901 |
| LRRBGS_0280 | SAMN10253673 | SRR8079895 |
| LRRBGS_0281 | SAMN10253481 | SRR8079765 |
| LRRBGS_0282 | SAMN10253674 | SRR8079896 |
| LRRBGS_0283 | SAMN10253675 | SRR8079873 |
| LRRBGS_0284 | SAMN10253676 | SRR8079867 |
| LRRBGS_0285 | SAMN10253677 | SRR8079868 |
| LRRBGS_0286 | SAMN10253678 | SRR8079866 |
| LRRBGS_0287 | SAMN10253679 | SRR8079874 |
| LRRBGS_0288 | SAMN10253482 | SRR8079764 |
| LRRBGS_0289 | SAMN10253680 | SRR8079893 |
| LRRBGS_0290 | SAMN10253681 | SRR8079872 |
| LRRBGS_0291 | SAMN10253682 | SRR8079871 |

|             |              |            |
|-------------|--------------|------------|
| LRRBGS_0292 | SAMN10253683 | SRR8079897 |
| LRRBGS_0293 | SAMN10253684 | SRR8079894 |
| LRRBGS_0294 | SAMN10253685 | SRR8079877 |
| LRRBGS_0295 | SAMN10253686 | SRR8079878 |
| LRRBGS_0296 | SAMN10253687 | SRR8079875 |
| LRRBGS_0297 | SAMN10253688 | SRR8079876 |
| LRRBGS_0298 | SAMN10253689 | SRR8079881 |
| LRRBGS_0299 | SAMN10253483 | SRR8079728 |
| LRRBGS_0300 | SAMN10253690 | SRR8079882 |
| LRRBGS_0306 | SAMN10253691 | SRR8079879 |
| LRRBGS_0307 | SAMN10253692 | SRR8079880 |
| LRRBGS_0308 | SAMN10253484 | SRR8079727 |
| LRRBGS_0309 | SAMN10253693 | SRR8079869 |
| LRRBGS_0310 | SAMN10253485 | SRR8079726 |
| LRRBGS_0311 | SAMN10253486 | SRR8079725 |
| LRRBGS_0312 | SAMN10253487 | SRR8079724 |
| LRRBGS_0313 | SAMN10253488 | SRR8079723 |
| LRRBGS_0314 | SAMN10253489 | SRR8079722 |
| LRRBGS_0316 | SAMN10253695 | SRR8079909 |
| LRRBGS_0317 | SAMN10253490 | SRR8079721 |
| LRRBGS_0318 | SAMN10253491 | SRR8079720 |
| LRRBGS_0319 | SAMN10253492 | SRR8079719 |
| LRRBGS_0320 | SAMN10253493 | SRR8079758 |
| LRRBGS_0321 | SAMN10253494 | SRR8079759 |
| LRRBGS_0322 | SAMN10253495 | SRR8079756 |
| LRRBGS_0323 | SAMN10253496 | SRR8079757 |
| LRRBGS_0324 | SAMN10253497 | SRR8079754 |
| LRRBGS_0325 | SAMN10253498 | SRR8079755 |
| LRRBGS_0326 | SAMN10253499 | SRR8079752 |
| LRRBGS_0327 | SAMN10253500 | SRR8079753 |
| LRRBGS_0328 | SAMN10253501 | SRR8079761 |
| LRRBGS_0329 | SAMN10253502 | SRR8079762 |
| LRRBGS_0330 | SAMN10253503 | SRR8079718 |
| LRRBGS_0331 | SAMN10253504 | SRR8079717 |
| LRRBGS_0332 | SAMN10590653 | SRR8329892 |
| LRRBGS_0333 | SAMN10253505 | SRR8079710 |
| LRRBGS_0334 | SAMN10253506 | SRR8079760 |
| LRRBGS_0335 | SAMN10253507 | SRR8079714 |
| LRRBGS_0336 | SAMN10253508 | SRR8079713 |
| LRRBGS_0337 | SAMN10253509 | SRR8079716 |
| LRRBGS_0338 | SAMN10590654 | SRR8329865 |
| LRRBGS_0339 | SAMN10590655 | SRR8329864 |
| LRRBGS_0340 | SAMN10253510 | SRR8079715 |
| LRRBGS_0341 | SAMN10253511 | SRR8079705 |
| LRRBGS_0342 | SAMN10253512 | SRR8079703 |
| LRRBGS_0343 | SAMN10253513 | SRR8079748 |
| LRRBGS_0344 | SAMN10253514 | SRR8079749 |



|             |              |            |
|-------------|--------------|------------|
| LRRBGS_0345 | SAMN10253515 | SRR8079750 |
| LRRBGS_0346 | SAMN10253516 | SRR8079751 |
| LRRBGS_0347 | SAMN10253517 | SRR8079744 |
| LRRBGS_0348 | SAMN10253518 | SRR8079745 |
| LRRBGS_0349 | SAMN10253696 | SRR8079908 |
| LRRBGS_0350 | SAMN10253697 | SRR8079911 |
| LRRBGS_0351 | SAMN10253698 | SRR8079910 |
| LRRBGS_0352 | SAMN10253699 | SRR8079913 |
| LRRBGS_0353 | SAMN10253519 | SRR8079746 |
| LRRBGS_0354 | SAMN10253520 | SRR8079747 |
| LRRBGS_0355 | SAMN10253521 | SRR8079741 |
| LRRBGS_0356 | SAMN10253522 | SRR8079742 |
| LRRBGS_0357 | SAMN10253523 | SRR8079743 |
| LRRBGS_0358 | SAMN10253524 | SRR8079738 |
| LRRBGS_0359 | SAMN10253525 | SRR8079736 |
| LRRBGS_0360 | SAMN10253526 | SRR8079735 |
| LRRBGS_0361 | SAMN10253527 | SRR8079734 |
| LRRBGS_0362 | SAMN10253528 | SRR8079729 |
| LRRBGS_0363 | SAMN10253700 | SRR8079912 |
| LRRBGS_0364 | SAMN10253701 | SRR8079915 |
| LRRBGS_0365 | SAMN10253702 | SRR8079914 |
| LRRBGS_0366 | SAMN10253703 | SRR8079907 |
| LRRBGS_0368 | SAMN10253529 | SRR8079699 |
| LRRBGS_0369 | SAMN10253530 | SRR8079700 |
| LRRBGS_0370 | SAMN10253531 | SRR8079701 |
| LRRBGS_0371 | SAMN10253532 | SRR8079698 |
| LRRBGS_0372 | SAMN10253533 | SRR8079763 |
| LRRBGS_0373 | SAMN10253534 | SRR8079732 |
| LRRBGS_0374 | SAMN10253535 | SRR8079706 |
| LRRBGS_0375 | SAMN10253536 | SRR8079709 |
| LRRBGS_0376 | SAMN10253537 | SRR8079731 |
| LRRBGS_0631 | SAMN10253540 | SRR8079730 |
| LRRBGS_0632 | SAMN10253541 | SRR8079739 |
| LRRBGS_0633 | SAMN10253542 | SRR8079740 |
| LRRBGS_0634 | SAMN10253705 | SRR8079806 |
| LRRBGS_0635 | SAMN10253543 | SRR8079708 |
| LRRBGS_0636 | SAMN10253706 | SRR8079807 |
| LRRBGS_0637 | SAMN10253707 | SRR8079808 |
| LRRBGS_0638 | SAMN10253708 | SRR8079809 |
| LRRBGS_0639 | SAMN10253709 | SRR8079810 |
| LRRBGS_0640 | SAMN10253710 | SRR8079811 |
| LRRBGS_0641 | SAMN10253711 | SRR8079812 |
| LRRBGS_0642 | SAMN10253712 | SRR8079813 |
| LRRBGS_0643 | SAMN10253713 | SRR8079814 |
| LRRBGS_0644 | SAMN10253544 | SRR8079707 |
| LRRBGS_0651 | SAMN10253714 | SRR8079815 |
| LRRBGS_0652 | SAMN10253715 | SRR8079855 |

|             |              |            |
|-------------|--------------|------------|
| LRRBGS_0653 | SAMN10253716 | SRR8079854 |
| LRRBGS_0654 | SAMN10253717 | SRR8079853 |
| LRRBGS_0655 | SAMN10253718 | SRR8079852 |
| LRRBGS_0656 | SAMN10253719 | SRR8079851 |
| LRRBGS_0657 | SAMN10253720 | SRR8079850 |
| LRRBGS_0658 | SAMN10253721 | SRR8079849 |
| LRRBGS_0659 | SAMN10253722 | SRR8079848 |
| LRRBGS_0660 | SAMN10253723 | SRR8079847 |
| LRRBGS_0661 | SAMN10253724 | SRR8079846 |
| LRRBGS_0663 | SAMN10253725 | SRR8079932 |
| LRRBGS_0664 | SAMN10253726 | SRR8079933 |
| LRRBGS_0665 | SAMN10253727 | SRR8079930 |
| LRRBGS_0666 | SAMN10253728 | SRR8079931 |
| LRRBGS_0667 | SAMN10253729 | SRR8079928 |
| LRRBGS_0668 | SAMN10253730 | SRR8079929 |
| LRRBGS_0669 | SAMN10253731 | SRR8079926 |
| LRRBGS_0670 | SAMN10253732 | SRR8079927 |
| LRRBGS_0671 | SAMN10253733 | SRR8079934 |
| LRRBGS_0672 | SAMN10253734 | SRR8079935 |
| LRRBGS_0673 | SAMN10253735 | SRR8079795 |
| LRRBGS_0674 | SAMN10253545 | SRR8079704 |
| LRRBGS_0675 | SAMN10253546 | SRR8079702 |
| LRRBGS_0676 | SAMN10253547 | SRR8079712 |
| LRRBGS_0677 | SAMN10253548 | SRR8079711 |
| LRRBGS_0697 | SAMN10590803 | SRR8329846 |
| LRRBGS_0394 | SAMN10590656 | SRR8329764 |
| LRRBGS_0395 | SAMN10590657 | SRR8329741 |
| LRRBGS_0396 | SAMN10590658 | SRR8329753 |
| LRRBGS_0397 | SAMN10590659 | SRR8329750 |
| LRRBGS_0398 | SAMN10590660 | SRR8329871 |
| LRRBGS_0399 | SAMN10590661 | SRR8329870 |
| LRRBGS_0400 | SAMN10590662 | SRR8329745 |
| LRRBGS_0401 | SAMN10590663 | SRR8329744 |
| LRRBGS_0402 | SAMN10590664 | SRR8329743 |
| LRRBGS_0403 | SAMN10590665 | SRR8329742 |
| LRRBGS_0404 | SAMN10590666 | SRR8329749 |
| LRRBGS_0405 | SAMN10590667 | SRR8329748 |
| LRRBGS_0406 | SAMN10590668 | SRR8329747 |
| LRRBGS_0407 | SAMN10590669 | SRR8329746 |
| LRRBGS_0409 | SAMN10590670 | SRR8329752 |
| LRRBGS_0410 | SAMN10590671 | SRR8329751 |
| LRRBGS_0411 | SAMN10590672 | SRR8329809 |
| LRRBGS_0412 | SAMN10590673 | SRR8329810 |
| LRRBGS_0413 | SAMN10590674 | SRR8329807 |
| LRRBGS_0414 | SAMN10590675 | SRR8329808 |
| LRRBGS_0415 | SAMN10590676 | SRR8329813 |
| LRRBGS_0416 | SAMN10590677 | SRR8329814 |

|             |              |            |
|-------------|--------------|------------|
| LRRBGS_0417 | SAMN10590678 | SRR8329811 |
| LRRBGS_0418 | SAMN10590679 | SRR8329812 |
| LRRBGS_0419 | SAMN10590680 | SRR8329805 |
| LRRBGS_0420 | SAMN10590681 | SRR8329806 |
| LRRBGS_0421 | SAMN10590682 | SRR8329788 |
| LRRBGS_0422 | SAMN10590683 | SRR8329787 |
| LRRBGS_0423 | SAMN10590684 | SRR8329790 |
| LRRBGS_0424 | SAMN10590685 | SRR8329789 |
| LRRBGS_0425 | SAMN10590686 | SRR8329792 |
| LRRBGS_0426 | SAMN10590687 | SRR8329791 |
| LRRBGS_0427 | SAMN10590688 | SRR8329794 |
| LRRBGS_0428 | SAMN10590689 | SRR8329793 |
| LRRBGS_0429 | SAMN10590690 | SRR8329786 |
| LRRBGS_0430 | SAMN10590691 | SRR8329785 |
| LRRBGS_0431 | SAMN10590692 | SRR8329837 |
| LRRBGS_0432 | SAMN10590693 | SRR8329838 |
| LRRBGS_0433 | SAMN10590694 | SRR8329839 |
| LRRBGS_0434 | SAMN10590695 | SRR8329840 |
| LRRBGS_0435 | SAMN10590696 | SRR8329841 |
| LRRBGS_0436 | SAMN10590697 | SRR8329842 |
| LRRBGS_0437 | SAMN10590698 | SRR8329843 |
| LRRBGS_0438 | SAMN10590699 | SRR8329844 |
| LRRBGS_0439 | SAMN10590700 | SRR8329835 |
| LRRBGS_0440 | SAMN10590701 | SRR8329836 |
| LRRBGS_0441 | SAMN10590702 | SRR8329824 |
| LRRBGS_0442 | SAMN10590703 | SRR8329823 |
| LRRBGS_0443 | SAMN10590704 | SRR8329822 |
| LRRBGS_0444 | SAMN10590705 | SRR8329821 |
| LRRBGS_0455 | SAMN10590706 | SRR8329820 |
| LRRBGS_0456 | SAMN10590707 | SRR8329819 |
| LRRBGS_0457 | SAMN10590708 | SRR8329818 |
| LRRBGS_0458 | SAMN10590709 | SRR8329817 |
| LRRBGS_0459 | SAMN10590710 | SRR8329816 |
| LRRBGS_0460 | SAMN10590711 | SRR8329815 |
| LRRBGS_0461 | SAMN10590712 | SRR8329878 |
| LRRBGS_0462 | SAMN10590713 | SRR8329879 |
| LRRBGS_0463 | SAMN10590714 | SRR8329876 |
| LRRBGS_0464 | SAMN10590715 | SRR8329877 |
| LRRBGS_0476 | SAMN10590716 | SRR8329874 |
| LRRBGS_0477 | SAMN10590717 | SRR8329875 |
| LRRBGS_0478 | SAMN10590718 | SRR8329872 |
| LRRBGS_0479 | SAMN10590719 | SRR8329873 |
| LRRBGS_0480 | SAMN10590720 | SRR8329880 |
| LRRBGS_0481 | SAMN10590721 | SRR8329881 |
| LRRBGS_0482 | SAMN10590722 | SRR8329855 |
| LRRBGS_0483 | SAMN10590723 | SRR8329854 |
| LRRBGS_0484 | SAMN10590724 | SRR8329857 |

|             |              |            |
|-------------|--------------|------------|
| LRRBGS_0485 | SAMN10590725 | SRR8329856 |
| LRRBGS_0487 | SAMN10590726 | SRR8329851 |
| LRRBGS_0488 | SAMN10590727 | SRR8329850 |
| LRRBGS_0489 | SAMN10590728 | SRR8329853 |
| LRRBGS_0490 | SAMN10590729 | SRR8329852 |
| LRRBGS_0491 | SAMN10590730 | SRR8329859 |
| LRRBGS_0492 | SAMN10590731 | SRR8329858 |
| LRRBGS_0493 | SAMN10590732 | SRR8329799 |
| LRRBGS_0494 | SAMN10590733 | SRR8329800 |
| LRRBGS_0495 | SAMN10590734 | SRR8329801 |
| LRRBGS_0496 | SAMN10590735 | SRR8329802 |
| LRRBGS_0502 | SAMN10590736 | SRR8329795 |
| LRRBGS_0503 | SAMN10590737 | SRR8329796 |
| LRRBGS_0504 | SAMN10590738 | SRR8329797 |
| LRRBGS_0505 | SAMN10590739 | SRR8329798 |
| LRRBGS_0506 | SAMN10590740 | SRR8329803 |
| LRRBGS_0507 | SAMN10590741 | SRR8329804 |
| LRRBGS_0508 | SAMN10590742 | SRR8329780 |
| LRRBGS_0509 | SAMN10590743 | SRR8329779 |
| LRRBGS_0510 | SAMN10590744 | SRR8329778 |
| LRRBGS_0511 | SAMN10590745 | SRR8329777 |
| LRRBGS_0512 | SAMN10590746 | SRR8329784 |
| LRRBGS_0513 | SAMN10590747 | SRR8329783 |
| LRRBGS_0514 | SAMN10253538 | SRR8079733 |
| LRRBGS_0515 | SAMN10590748 | SRR8329782 |
| LRRBGS_0516 | SAMN10590749 | SRR8329781 |
| LRRBGS_0517 | SAMN10590750 | SRR8329776 |
| LRRBGS_0518 | SAMN10590751 | SRR8329775 |
| LRRBGS_0519 | SAMN10590752 | SRR8329756 |
| LRRBGS_0520 | SAMN10590753 | SRR8329757 |
| LRRBGS_0521 | SAMN10590754 | SRR8329754 |
| LRRBGS_0541 | SAMN10590755 | SRR8329755 |
| LRRBGS_0542 | SAMN10590756 | SRR8329760 |
| LRRBGS_0543 | SAMN10590757 | SRR8329761 |
| LRRBGS_0544 | SAMN10590758 | SRR8329758 |
| LRRBGS_0545 | SAMN10590759 | SRR8329759 |
| LRRBGS_0546 | SAMN10590760 | SRR8329762 |
| LRRBGS_0547 | SAMN10590761 | SRR8329763 |
| LRRBGS_0548 | SAMN10590762 | SRR8329766 |
| LRRBGS_0549 | SAMN10590763 | SRR8329765 |
| LRRBGS_0550 | SAMN10590764 | SRR8329768 |
| LRRBGS_0560 | SAMN10253539 | SRR8079737 |
| LRRBGS_0561 | SAMN10590765 | SRR8329767 |
| LRRBGS_0562 | SAMN10590766 | SRR8329770 |
| LRRBGS_0563 | SAMN10590767 | SRR8329769 |
| LRRBGS_0564 | SAMN10590768 | SRR8329772 |
| LRRBGS_0565 | SAMN10590769 | SRR8329771 |

|             |              |            |
|-------------|--------------|------------|
| LRRBGS_0566 | SAMN10590770 | SRR8329774 |
| LRRBGS_0567 | SAMN10590771 | SRR8329773 |
| LRRBGS_0568 | SAMN10590772 | SRR8329862 |
| LRRBGS_0577 | SAMN10590773 | SRR8329863 |
| LRRBGS_0578 | SAMN10590774 | SRR8329739 |
| LRRBGS_0579 | SAMN10590775 | SRR8329740 |
| LRRBGS_0580 | SAMN10590776 | SRR8329866 |
| LRRBGS_0581 | SAMN10590777 | SRR8329867 |
| LRRBGS_0582 | SAMN10590778 | SRR8329868 |
| LRRBGS_0583 | SAMN10590779 | SRR8329869 |
| LRRBGS_0584 | SAMN10590780 | SRR8329860 |
| LRRBGS_0585 | SAMN10590781 | SRR8329861 |
| LRRBGS_0586 | SAMN10590782 | SRR8329889 |
| LRRBGS_0595 | SAMN10590783 | SRR8329888 |
| LRRBGS_0596 | SAMN10590784 | SRR8329887 |
| LRRBGS_0597 | SAMN10590785 | SRR8329886 |
| LRRBGS_0598 | SAMN10590786 | SRR8329885 |
| LRRBGS_0599 | SAMN10590787 | SRR8329884 |
| LRRBGS_0600 | SAMN10590788 | SRR8329883 |
| LRRBGS_0601 | SAMN10590789 | SRR8329882 |
| LRRBGS_0602 | SAMN10590790 | SRR8329891 |
| LRRBGS_0603 | SAMN10590791 | SRR8329890 |
| LRRBGS_0619 | SAMN10590792 | SRR8329833 |
| LRRBGS_0620 | SAMN10590793 | SRR8329834 |
| LRRBGS_0621 | SAMN10590794 | SRR8329831 |
| LRRBGS_0622 | SAMN10590795 | SRR8329832 |
| LRRBGS_0623 | SAMN10590796 | SRR8329829 |
| LRRBGS_0624 | SAMN10590797 | SRR8329830 |
| LRRBGS_0625 | SAMN10590798 | SRR8329827 |
| LRRBGS_0626 | SAMN10590799 | SRR8329828 |
| LRRBGS_0627 | SAMN10590800 | SRR8329825 |
| LRRBGS_0628 | SAMN10590801 | SRR8329826 |
| LRRBGS_0629 | SAMN10590802 | SRR8329847 |
